# Supplementary material
Source: PubMed Central journal article supplement (PMC7533884)
Supplement: pnas.2007835117.sapp.pdf [file pnas.2007835117.sapp.pdf]

# SUPPLEMENTARY INFORMATION

— For Online Publication —

## A Social media data

We use governors' tweets as a proxy to capture their public messages (cues). In this section we describe how this measure was devised. First, we identified both the official and the personal Twitter accounts of all USA governors. We then collected tweets published by these accounts between February 15th and March 31st . For this purpose, we wrote a simple script to download tweets via Twitter API (Application Programming Interface) using R (version 3.5.1). We removed quoted tweets (tweets directly citing other tweets) and retweets from the downloaded dataset. Replying tweets (tweets directly replying to other tweets) were also excluded, except for the cases where a replying tweet and an original one were written by the same account (threads).

We downloaded a total of 10,688 tweets from the official and personal accounts of the governors of 50 US states, of which 7,958 contained information relevant to COVID-19. The tweets were aggregated into a single CSV file, and then coded using research assistants that were trained based on the following codebook:

### A.1 Instructions to code governors' Twitter feed

For each tweet, we follow the following steps:

1. Identify if the tweet is about the COVID-19/Coronavirus crisis. If yes, mark 1 in the column titled "covid\_related." If no, mark 0 and move to the next tweet.
2. If yes, then identify whether the tweet is related to social distancing. If it is, mark 1 in the social\_distance column. If not, mark 0.
3. Then identify whether the tweet is related to shelter in place. If it is, mark 1 in the shelter\_in\_place column. If not, mark 0.

**1. Coronavirus related:** This includes all tweets that relate to the current COVID-19 crisis, whether or not they explicitly mention the words "coronavirus" or "Covid-19." For example, consider the following tweet. While it does not explicitly mention the name of the virus, it clearly refers to the coronavirus crisis.

*“Have supplies on hand, but don’t hoard. Contact your healthcare provider about obtaining extra necessary medications to have on hand.”*

**2. Social distancing:** This includes all tweets that encourage, explain, or otherwise refer to the concepts of social distancing. Some key words and phrases to look out for in these tweets will be “avoid gatherings / crowded places / large events,” “physical distancing,” “keep 6 feet apart,” and “flatten the curve”. These key words are simply examples; they are NOT exhaustive. Please note that calls to “avoid sick people/people with symptoms” are NOT calls to social distancing. There is a distinction between tweets about avoiding your own infection (e.g., wash your hands, avoid sick people, etc), and those that focus more on not spreading the disease as a transmission vector. We care about the latter. For example:

*“There are steps every Arizonan can take to prevent the spread: Wash your hands for at least 20 seconds; Avoid touching your eyes, nose and mouth; Avoid close contact with people who are sick; Cover your cough or sneeze.*

Is not about social distancing, since it only mentions how to prevent your own infection. In contrast, the tweet below is about social distancing, because it mentions “stay away from crowds”

*“Don’t fear covid19 virus, just be smart. Wash your hands. Don’t shake hands, stay home if not feeling well, **stay away from crowds.** These simple steps will keep most of us away from the hospitals. It isn’t the end of the world. Just focus on good hygiene and change a few habits.”*

**3. Shelter in place:** This refers to tweets that explicitly call on citizens to stay at home and avoid going out for non-essential business. Some key words to look out for are “stay home,” “work from home” “shelter in place,” “safer at home.” These key words are simply examples; they are NOT exhaustive. For example, the tweet below explicitly calls on people to stay home and should be coded as 1. However, the tweet below it does not call for staying at home, just social distancing.

*“Reminder to our young people: you are not immune to #COVID19 or invincible. You can get coronavirus and you can spread it to loved ones. Don’t be selfish. Take this seriously. Stay safe, stay home.”*

*“Social distancing is a primary protective measure to flatten the curve of this virus. I cannot underscore the seriousness of following these measures to help our neighbors, friends, and families.”*

Finally, note that staying home is a form of extreme social distancing. Therefore all stay home tweets should also be social distancing tweets. However, the reverse is not true. There may be weaker forms of social distancing that are not fully stay home.

## A.2 Facebook data

We also consider a proxy for governors’ messaging based on data from their Facebook posts. We identified both the official and the personal Facebook public pages of all the governors of all 50 states. We then collected Facebook posts published on these pages between February 15th and March 31st. For this purpose, we wrote a script to retrieve Facebook posts using the Python programming language (version 3.7.3). The downloaded posts were then coded using research assistants, who were trained based on the same instructions used for the coding of the governors’ tweets. We also collected information about the number of Facebook users following each page as of June 6th. We downloaded a total of 6,771 Facebook posts, of which 4,461 contained information relevant to COVID-19.

## B Estimation strategy

To estimate the baseline effect of messaging, we estimate a simple differences-in-differences regression using a two-way fixed effects specification for county  $i$  in state  $s$  day  $t$

$$y_{ist} = \alpha + \theta STAYHOME_{st} + \delta_t + \zeta_i + X'_{ist}\beta + \epsilon_{ist}$$

Where  $STAYHOME_{st}$  is a treatment indicator that equals one in all periods after the governor of state  $s$  first issues a public message encouraging citizens to stay home and  $\delta_t$  are day fixed effects and  $\zeta_i$  are county fixed effects.  $X_{ist}$  is a vector of county and state-level control variables, which are either time-varying or, if fixed, then interacted with day fixed effects  $\delta_t$ . Controls are daily county-level confirmed COVID-19 cases and state-level confirmed COVID-19 deaths, county-level demographics including median age, log household income, population density, share over 65, share black, Hispanic, white, and male, as measured in the most recent American Community Survey (ACS), indicators for COVID-19 messaging that does not explicitly encourage staying at home, and dummies for state-days in which various stay home orders are in effect. We include the following state-level orders: emergency declaration, banning large gatherings, school closures, closures of non-essential businesses, closure of bars/restaurants, and stay home/shelter in place orders.

We consider several different specifications, including measuring the independent variable  $STAYHOME_{st}$

as the cumulative number of “stay home” tweets issued in the past 3 or 5 days, or one-day lagged number of stay home tweets. We also consider similar specifications where the communications of interest are those encouraging only physical distancing, rather than staying at home. For these regressions, we cluster our standard errors at the level of the state, since all counties within a state are perfectly correlated in their treatment exposure. We estimate this difference-in-differences regression on the entire sample, and on GOP and Democratic counties separately.

To estimate the dynamic effects of messaging, as well as test pre-trends in the outcome variable before a tweet was issued, we estimate the following event-study regression using a two-way fixed effects specification for county  $i$  in state  $s$  day  $t$

$$y_{ist} = \alpha + \sum_{\tau=-10}^{15} \theta_{\tau} STAYHOME_{s\tau} + \delta_t + \zeta_i + X'_{ist}\beta + \epsilon_{ist}$$

Where  $\tau$  indicates leads and lags of the treatment period,  $STAYHOME_{s\tau}$  are dummies for these leads and lags, and  $\theta_{\tau}$ ,  $\tau > 0$  give the dynamic treatment effects while  $\theta_{\tau}$ ,  $\tau < 0$  test pre-treatment trends. The omitted reference period is  $\tau = -1$ . We estimate this event-study regression on the entire sample, and on GOP and Democratic counties separately.

To estimate the effect of messaging by county-level political affiliation, we estimate several triple-difference models using two-way fixed effects for county  $i$  in state  $s$  day  $t$ . In the first set of these models, we interact the exposure to state-level messaging with county-level variation in political affiliation.

$$y_{ist} = \alpha + \phi_1 STAYHOME_{st} + \phi_2 STAYHOME_{st} \times MARGIN_i + \delta_t + \delta_t \times MARGIN_i + X'_{ist}\beta + \zeta_i + \epsilon_{ist}$$

In this case,  $MARGIN_i$  is county  $i$ 's Republican vote share – measured as Donald Trump's 2016 margin of victory. In these specifications, we also cluster standard errors conservatively at the state level, even though the variation of interest –the interaction term – is at the county-year level.

Finally, to test whether the county-level partisans response to political messaging varies by the governor's party, we consider the quadruple-difference estimation strategy:

$$\begin{aligned} y_{ist} = & \alpha + \phi_1 STAYHOME_{st} + \phi_2 STAYHOME_{st} \times MARGIN_i + \phi_3 STAYHOME_{st} \times GOPGOV_s \\ & + \phi_4 STAYHOME_{st} \times GOPGOV_s \times MARGIN_i + \delta_t + \delta_t \times MARGIN_i \\ & + \delta_t \times GOPGOV_s + \delta_t \times GOPGOV_s \times MARGIN_i + \zeta_i + X'_{ist}\beta + \epsilon_{ist} \end{aligned}$$

We consider specifications where  $MARGIN_i$  is measured as a continuous measure of Trump's

2016 vote margin, or an indicator variable equaling one if Trump won the county in 2016. In the binary case,  $\phi_1$  gives the effect of the governor's tweet in Democratic states in centrist counties,  $\phi_1 + \phi_2$  is the effect in Trump-supporting counties of Democratic states,  $\phi_1 + \phi_3$  is Democratic counties under Republican governors, and  $\phi_1 + \phi_2 + \phi_3 + \phi_4$  the effect of the tweet in the Republican counties of Republican states. The quadruple-difference model is completed by the relevant two- and three-way interactions with the day fixed effects.

## C Supplementary figures

### C.1 Descriptive information on Governors' tweets

In this section, we present basic descriptive information on the dataset of governors' tweets described in Appendix [A](#).

In Figure [SI-1](#), we calculate the state-level difference between the date of the first stay-at-home order and the date of the first tweet encouraging citizens to stay home. Negative numbers indicate that the tweet was issued before the policy, and positive numbers indicate the opposite. We then plot the distribution of these differences separately for Republican and Democratic governors, with vertical lines to indicate the group-specific median number of days between order and tweet. While the earliest tweeters appear to be Republican governors, the peak of the Democratic distribution is well to the left of zero, with a median of -6. In contrast, the Republican distribution is clustered near zero, with a median of -1.5. On average, Democratic governors tweet about staying home far before implementing orders, while Republican governors typically only tweet about staying home in the days leading up to and after an order is issued.

In Figure [SI-2](#), we plot the cumulative number of tweets over time by tweet subject and governor party. Comparing across tweet subjects, we find that governors tweet substantially more about COVID-19/coronavirus in general than they do about specific recommendations for either social distancing or staying at home. Democratic governors tweet more and earlier about all three topics.

Figure [SI-3](#) visualizes the correlation between the timing of governors' communications around COVID-19 on different social media platforms. The  $x$ -axis indicates the date at which the governor first tweeted messages to stay at home, while the  $y$ -axis measures the same timing variable for Facebook communications. The dashed line indicates the 45-degree line – all governors above this line issued tweets before Facebook posts, while the reverse is true for all those below the line. The plot shows a strong positive correlation in timing between Facebook and Twitter stay-at-home messaging. The bivariate  $R^2$  between the two is 0.858, and 32 governors issued these initial communications on both platforms on the same day. We take this as evidence that the timing of Twitter communications is a good proxy for communication across multiple media sources.

Figure [SI-4](#) plots the correlation between the log number of followers on Facebook and Twitter for governors' official and private social media accounts. While Facebook accounts are typically larger, there is a strong positive correlation between followers across platforms. Again, this supports the assumption that Twitter exposure proxies well for exposure to governors' communications from other forms of media.

Figure SI-1: Days between date of stay at home order and date of first tweet

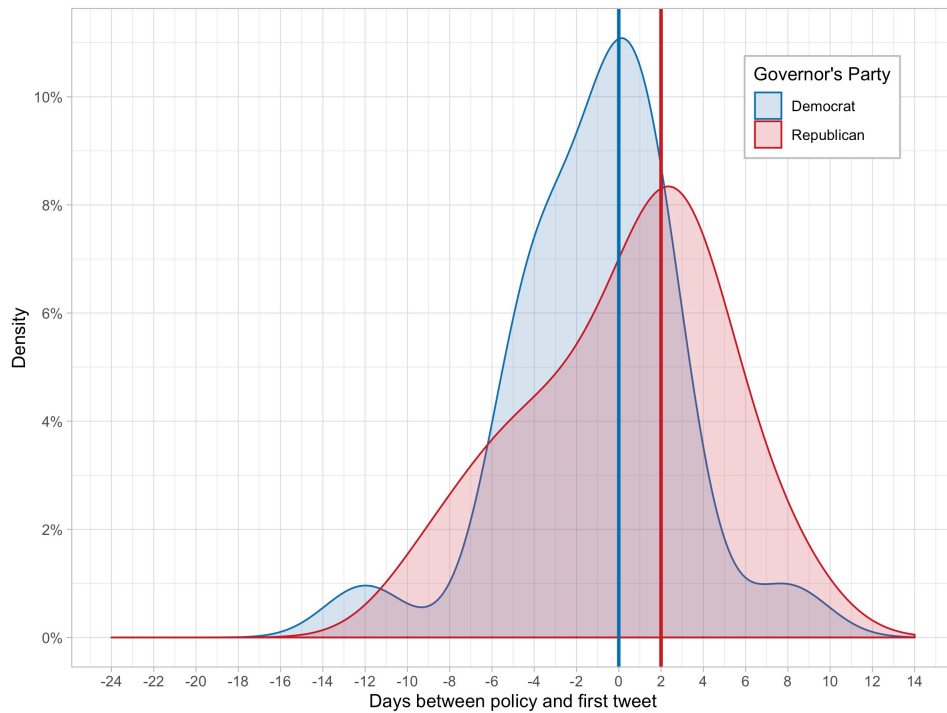

**Note:** Figure shows the distribution of the difference in days between the governors' first tweet explicitly encouraging staying at home and the state's first official stay-at-home order. Vertical lines indicate median difference in days for each party.

Figure SI-2: Intensity of Governors' COVID-19 tweets over time

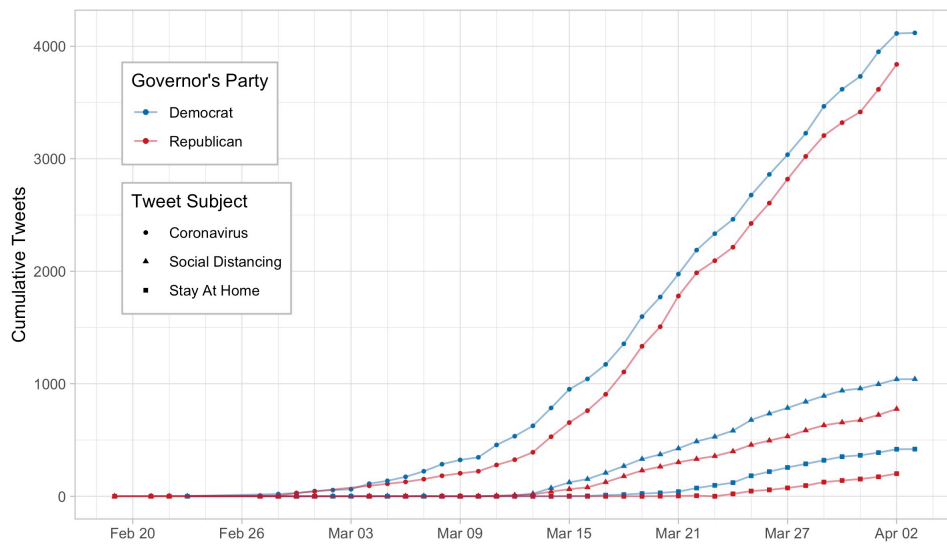

**Note:** Figure shows the cumulative number of governors' tweets about a topic, by topic, date, and governor party. Tweet topic is indicated in legend.

Figure SI-3: Date of governors' first tweets and Facebook posts

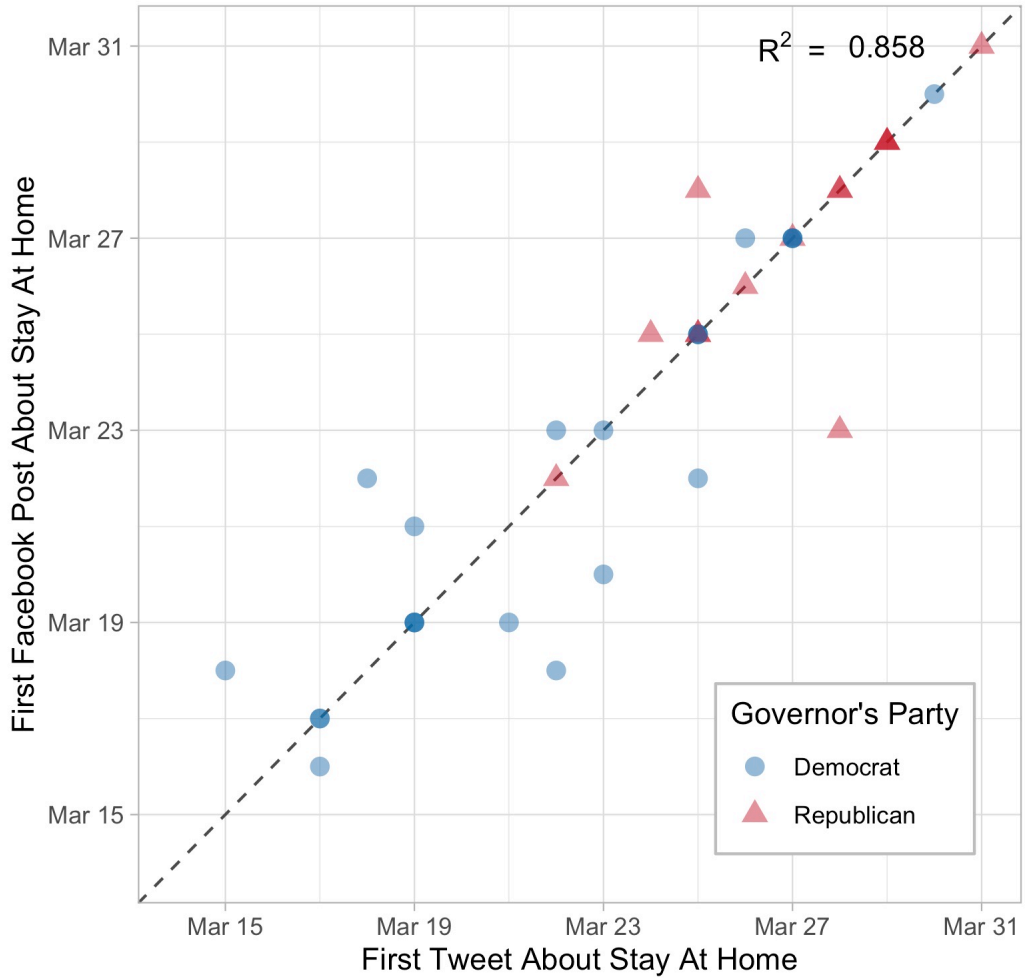

**Note:** Figure plots the date of a governor's first Facebook post explicitly encouraging staying at home against the date of that governor's first tweet explicitly encouraging staying at home. Dashed line is the 45-degree line, with bivariate  $R^2$  indicated in the plot.



Figure SI-4: Governors' followers on Facebook and Twitter

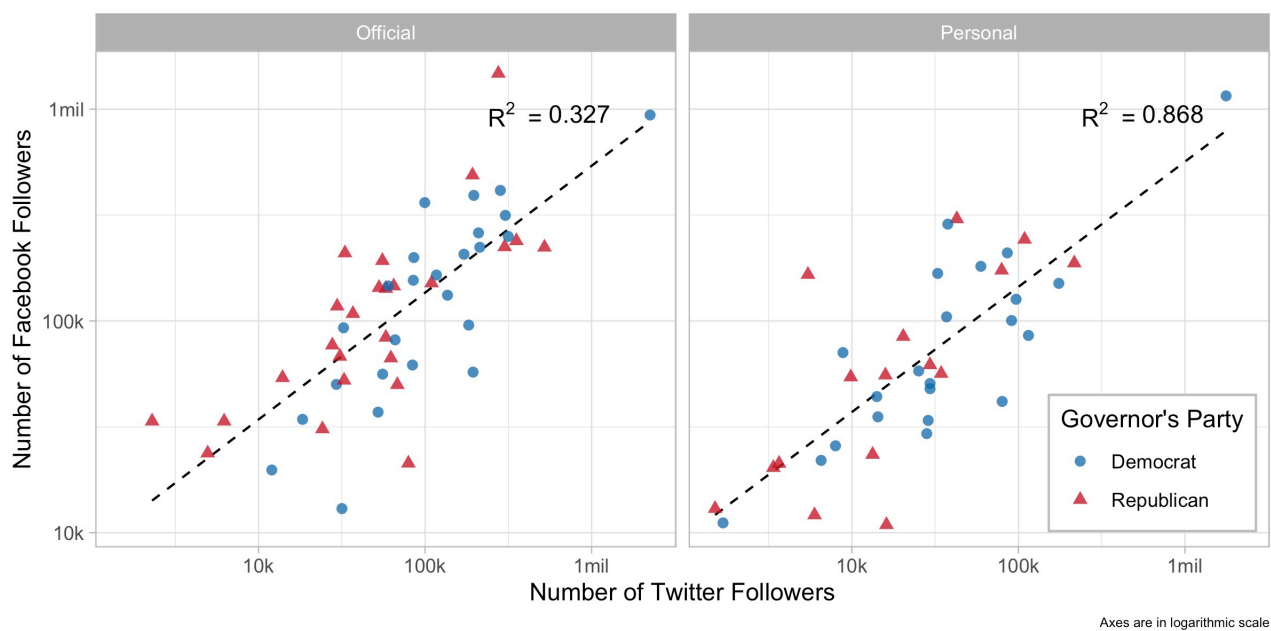

**Note:** Figure plots the log number of Facebook followers against the log number of Twitter followers for governors' official (left panel) and personal (right panel) social media accounts. Dashed line gives the linear OLS fit, with bivariate  $R^2$  indicated in the plot.

## C.2 Google Trends

In this section, we consider trends in Google search interest for various search terms as a proxy for citizens' beliefs about coronavirus-related topics. First, we de-normalize the raw Google trends data such that all metro-day units are normalized relative to a single reference point. In Figure [SI-5](#) we plot search interest over time for "social distancing" in Panel A and "coronavirus" in Panel B, for each metro area. We split these plots by metro areas under Democratic governors (left panel) vs. Republican governors, (right panel) and then overlay the mean search interest trend separately for metro areas that voted Republican vs. Democratic in the 2016 presidential election. All trends are estimated with a lowess smoother.

In Panel A, we see that mean search interest in social distancing among voters of both parties begins earlier and is greater under Democratic governors, likely because, as Figure [SI-2](#) makes clear, Democratic governors are tweeting about social distancing earlier and more frequently than Republicans. In addition, across states of different parties, mean search interest in social distancing is always greater in Democratic-leaning metro areas. However, these partisan gaps differ depending on the identity of the governor. The partisan difference in search interest between voters is greater than among Democratic than Republican governors. Importantly, we see no such partisan differences – either across or within states – in search interest for "coronavirus." Therefore, while all citizens, regardless of political beliefs or governor identity, exhibit equal mean search interest for coronavirus, there are substantial differences in interest for social distancing. These patterns suggest a potentially interesting interaction between citizen and governor identity in forming beliefs about the merit of voluntary social distancing interventions.

Figure SI-5: Google search interest by partisan alignment and governor's party over time

(a) Social distancing

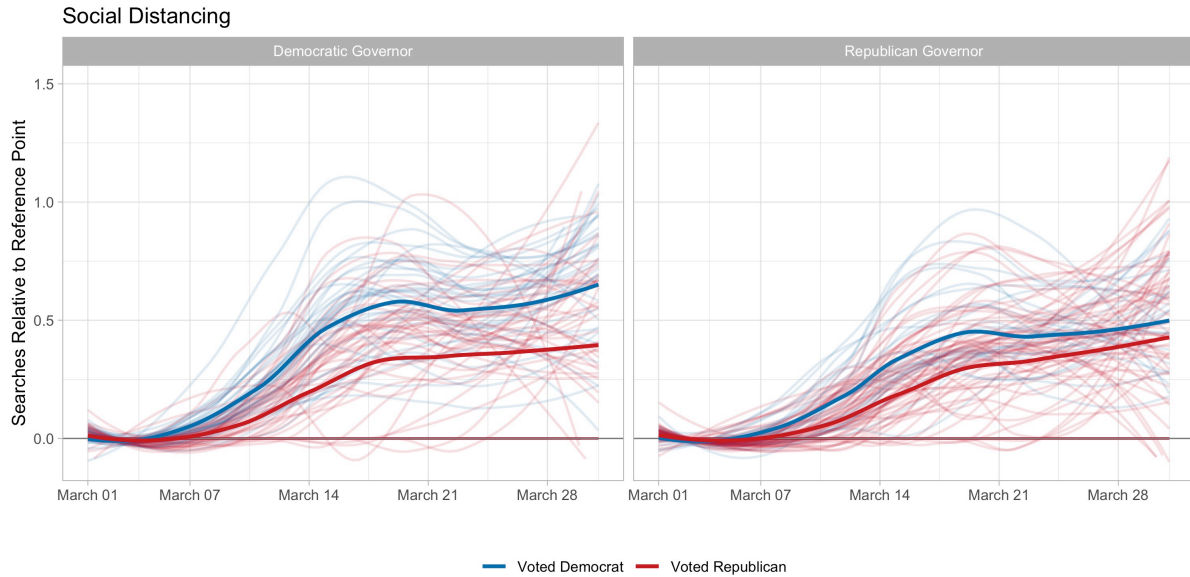

(b) Coronavirus

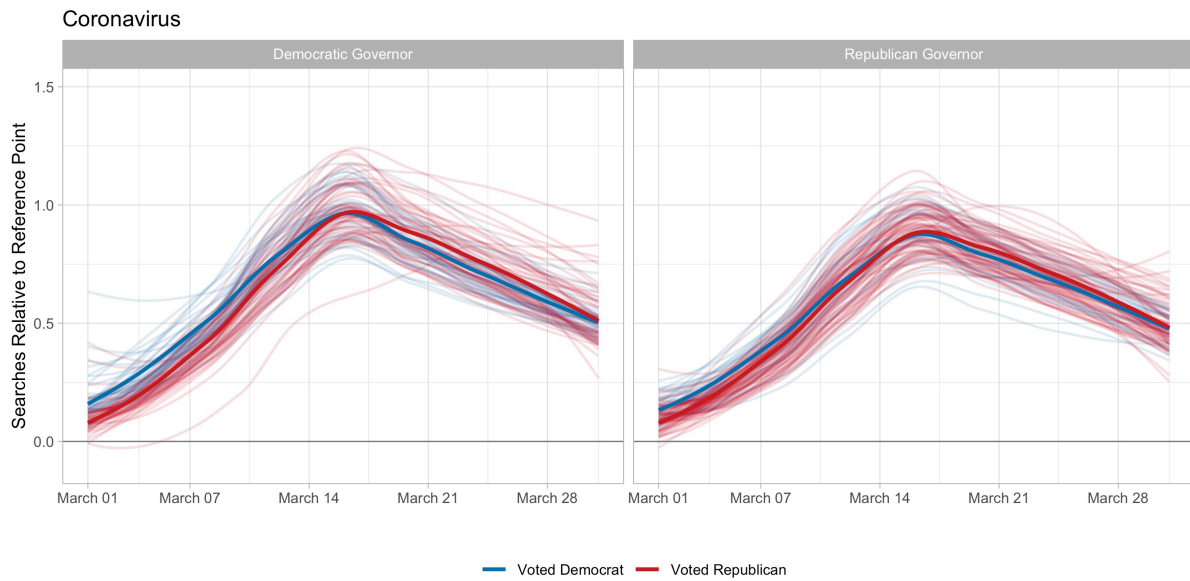

**Note:** Figure shows the daily relative Google search interest for the term “social distancing” in Panel A and “Coronavirus” for 205 metro-areas in the United States from March 1-March 31. All search numbers are normalized relative to a reference group. Trends are adjusted using a lowess smoother. Metro-areas are defined as “Republican” if Donald Trump’s margin of victory in the 2016 presidential election is greater than 5%. Thick lines indicate mean search interest across metros for republican and democratic states.

### C.3 Mobility before and after stay-at-home orders

In this section, we analyze trends in mobility before and after state-level shelter-in-place/stay-at-home orders are issued for each of the four mobility outcomes. We estimate trends separately before and after the issuing of stay-at-home orders using a third-order polynomial. Across each outcome in Figure SI-6, we find that mobility reduces substantially before the stay-home order was issued. In fact, reductions in mobility are approximately equal in magnitude before and after the order, and the slope of the trend function does not meaningfully differ. This indicates that the pre-order period in which behavior change is broadly voluntary is critical for understanding behavioral responses to coronavirus.

Figure SI-6: Mobility relative to stay at home orders

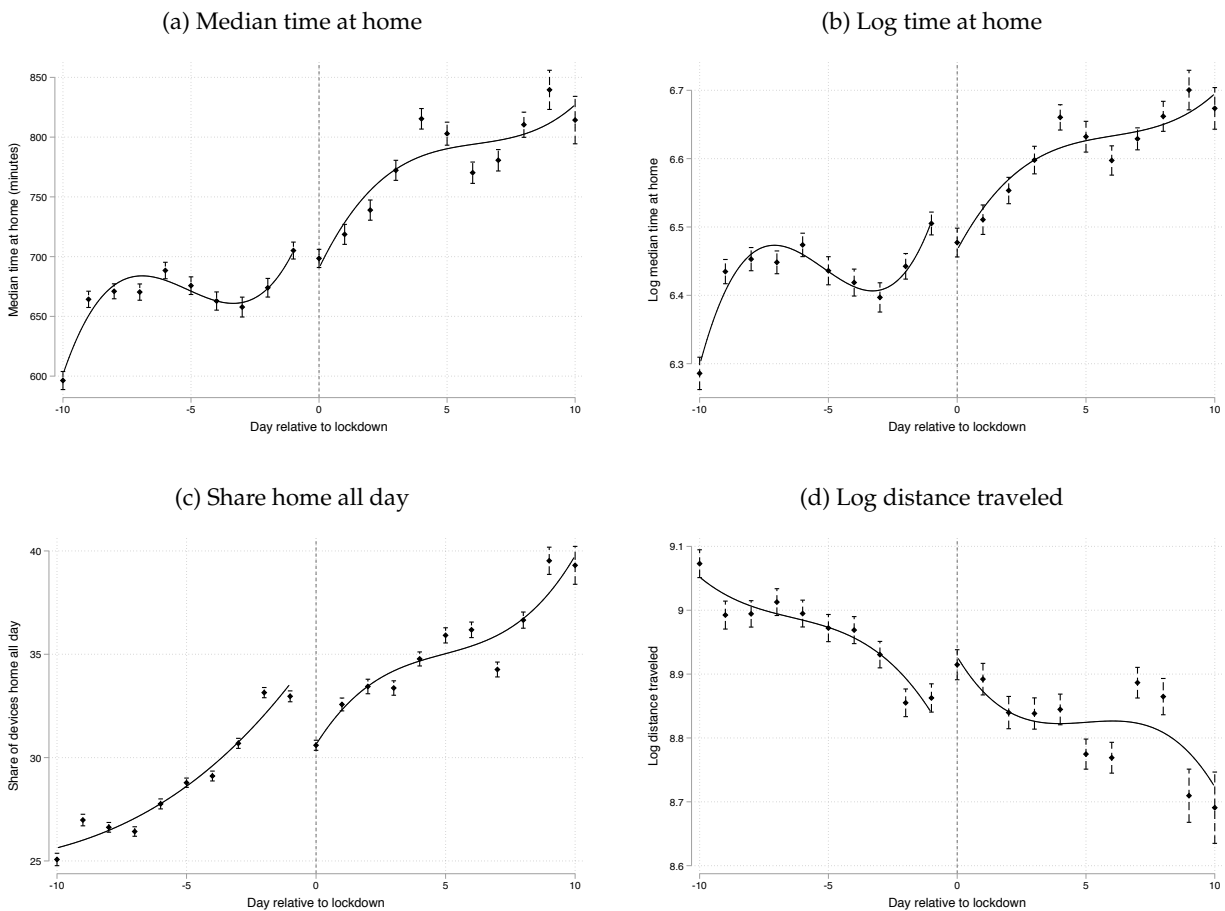

**Note:** Figure shows trends in mobility, as measured by median home dwelling time (Panel A), log of median home time (Panel B), the share of location-enabled devices home all day (Panel C), and the log of median distance traveled (Panel D) relative to the governors' issuance of a statewide stay-home order. Points indicate means in the outcome variable across counties for a given day relative to the stay-home order, with 95% confidence intervals. Trends are estimated parametrically with a third-order polynomial separately before and after the stay-home order.

## C.4 Event study plots

In this section, we assess the plausibility of the key assumption of our empirical strategy – that counties governed by governors that issued stay-home-related Twitter communications exhibit parallel trends in mobility relative to those in states that do not. To provide evidence for this assumption, we analyze the pre-treatment trends of the key mobility outcomes in treatment relative to control counties. We estimate pre-trends using the standard event-study regression model described in Appendix B, in which the outcome is regressed on dummy variables for leads and lags of the treatment, as well as controls and fixed effects.<sup>16</sup> The event-study model also allows us to estimate the dynamic path of effects in order to determine the “onset” time of the treatment, as well as whether the effects fade or grow over time.

Figure SI-7 plots the coefficients from the event-study regression for the four major outcomes – median home time, log median home time, share of devices home all day, and log distance travelled – in the full sample. In general, we see that parallel trends appear to hold; across all four outcomes, only one of the pre-period coefficients out of 36 are significantly different from zero at the 5% level. In contrast, the post-period coefficients are generally positive and significant, with the effects most pronounced for median time at home (Panel A) and share home all day (Panel C). In general, a stay-home message does not produce an immediate response, but rather takes 2-3 days to generate change in behavior. This makes sense if the first tweet marks a change in messaging that is followed by more communications on the subject. The coefficients then rise (or fall, in Panel D) before plateauing 10-11 days after the initial tweet. For median time home – our main outcome of interest – the maximum daily impact of governor’s messaging on behavior occurs 11 days after the initial communication and corresponds to 31.7 minute increase in daily time at home, on average, or a 6% increase, as we can see from Panel B.

Figure SI-8 then splits the sample by county-level partisan alignment to test whether the assumption of parallel trends is likely to hold in these subsamples, as well as to compare the dynamic effect sizes by party. Again the parallel trends assumption seems likely to be satisfied, as pre-period coefficients are clustered around zero and are rarely significant. In general, the effect sizes do appear larger among the sample of Democratic counties. However, due to a much larger sample, the Republican coefficients are more precisely estimated. This provides at least suggestive evidence that Democrats respond more actively to their governors’ stay home messaging with voluntary behavior change, though the differences in the event-study coefficients by party are unlikely to be statistically

---

<sup>16</sup> Recall that the treatment date is defined as the date when the governor first issued a tweet encouraging individuals to stay home.

significant given the wide confidence intervals in the Democratic sample.

Lastly, in Figure SI-9 we estimate the event-study regression for the full sample on the metro-area-level Google trends data, with search interest for the term “stay at home” as the dependent variable. Again the pre-trend coefficients are not significantly different from zero and display no discernible trend. However, search interest for “stay at home” relative to the control group spikes on the exact day that the tweet is issued, and remains elevated for 4 days after, before dropping off to zero. The fact that this spike in interest occurs in exactly the period before behavior change has begun suggests that individuals first respond to the tweet by updating their beliefs about the importance of staying home – as reflected in search interest – before moving to actively changing behavior.

Figure SI-7: Event study: governor tweets “stay home,” baseline effects

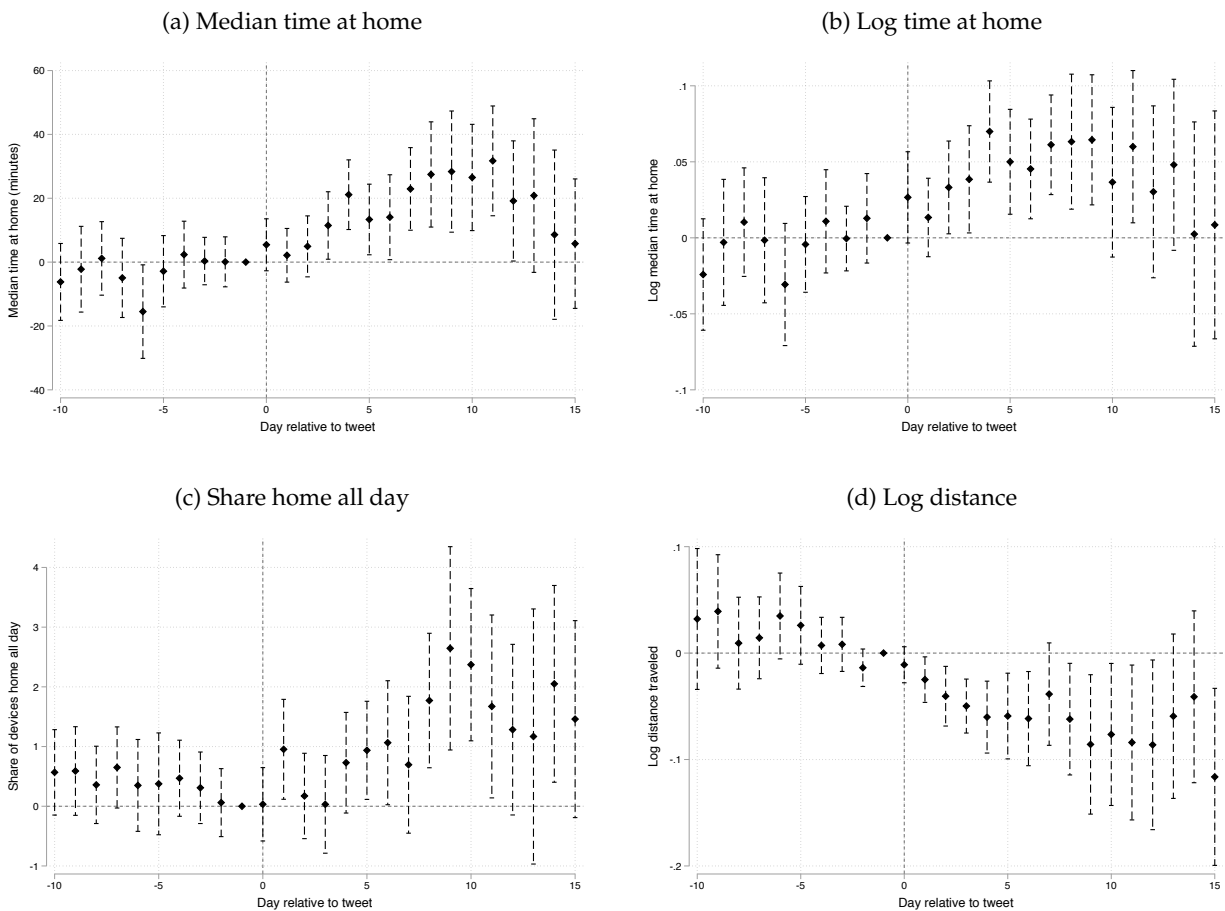

**Note:** Figure shows coefficients from a county-level event-study regression of median time at home (Panel A), log of median home time (Panel B), share home all day (Panel C), and log distance travelled (Panel D) on indicators for leads and lags of the treatment, county and day fixed effects, and controls for COVID cases, deaths, and other orders, as well as demographics and Trump margin interacted with day fixed effects. The treatment is a dummy variable equaling 1 for all days after a governor issues their first tweet mentioning the phrase “stay home.” Standard errors are clustered at the state-level.

Figure SI-8: Event study: governor tweets “stay home,” by partisan lean

(a) Log time at home

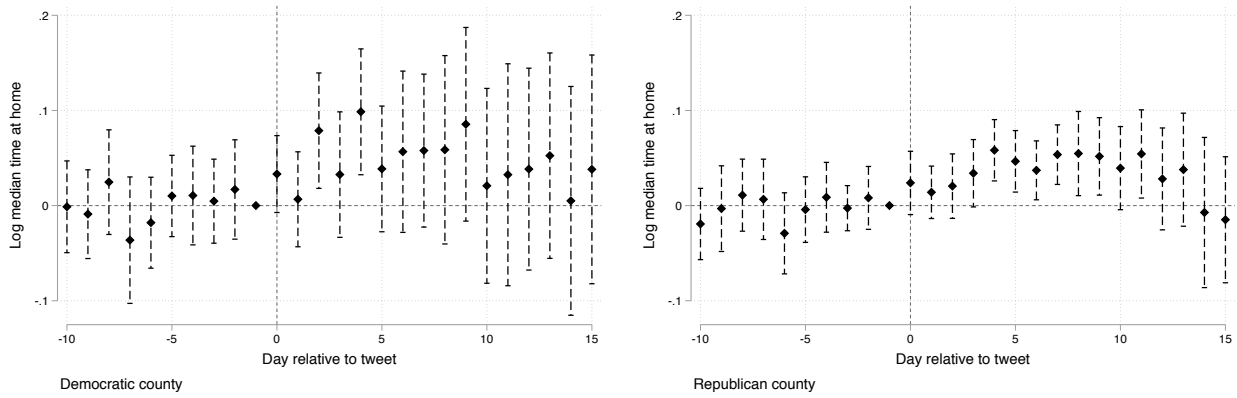

(b) Share home all day

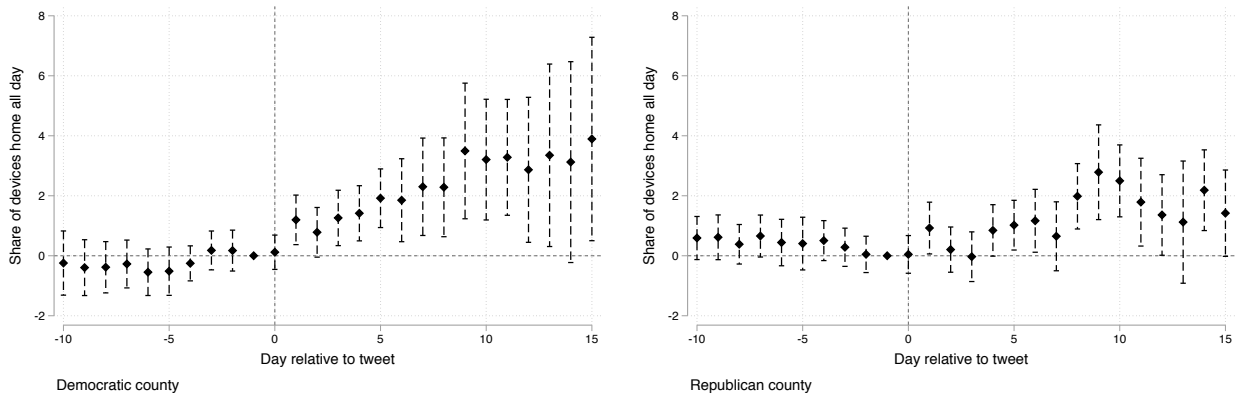

(c) Log distance traveled

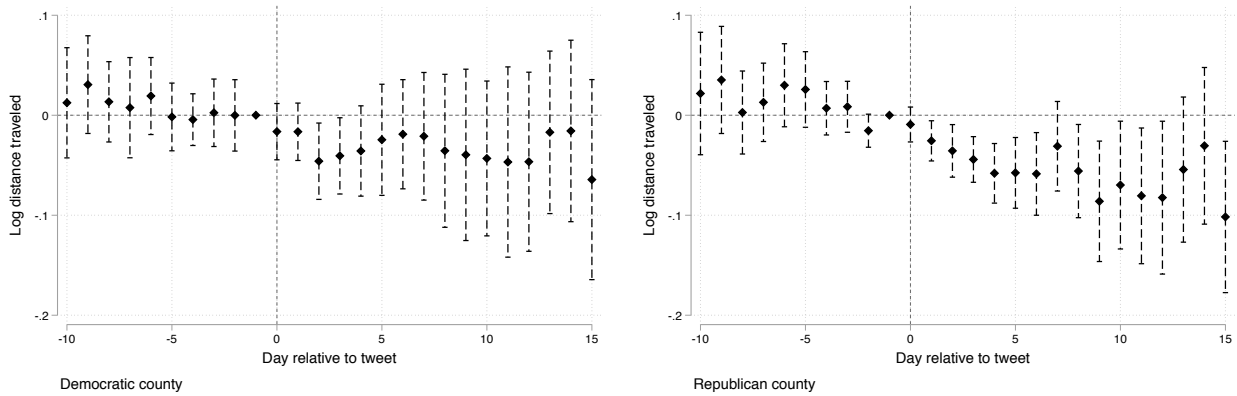

**Note:** Figure shows coefficients from a county-level event-study regression of the outcome variable indicated in subfigure caption on indicators for leads and lags of the treatment, county and day fixed effects, and controls for COVID cases, deaths, and other orders, as well as demographics and Trump margin interacted with day fixed effects. The treatment is a dummy variable equaling 1 for all days after a governor issues their first tweet encouraging citizens to stay at home. Sample is split by Democratic counties and Republican counties. Republican counties are those where Donald Trump’s margin of victory in the 2016 presidential election was greater than 5%. Standard errors are clustered at the state-level.

Figure SI-9: Event study: governor tweets “stay home,” Google searches

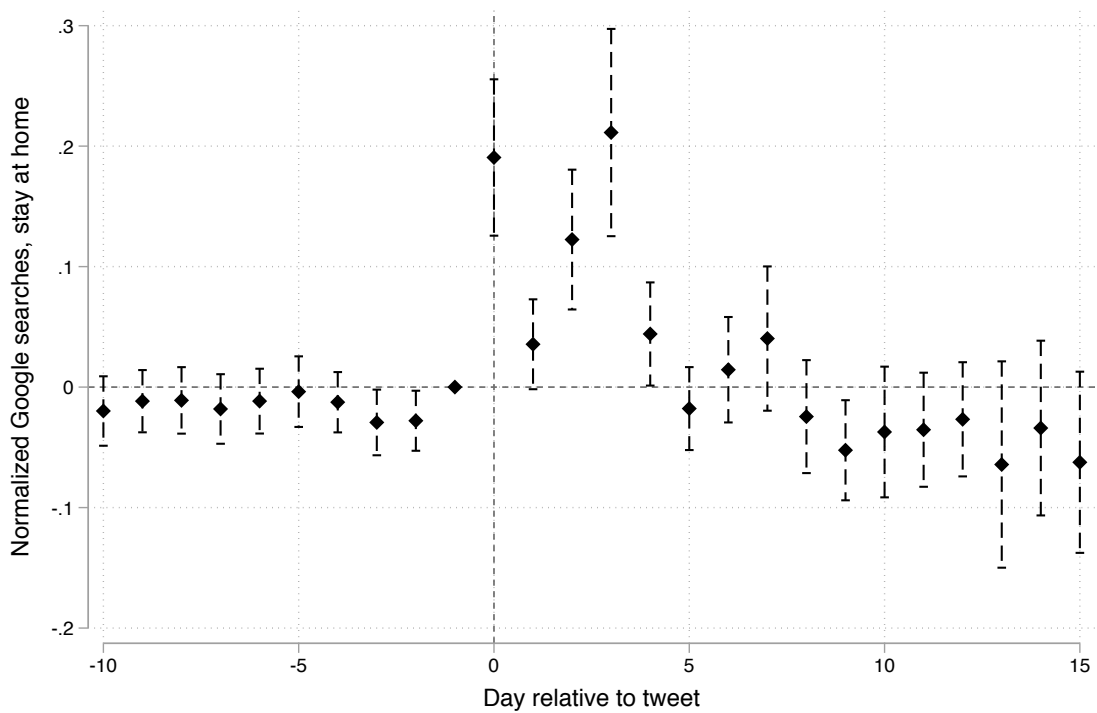

**Note:** Figure shows coefficients from a metro-area-level event-study regression of the outcome on indicators for leads and lags of the treatment, as well as county and day fixed effects. The treatment is a dummy variable equaling 1 for all days after a governor issues their first tweet encouraging citizens to stay home. Outcome variable is the daily search interest for the phrase “stay at home,” relative to reference point.



## C.5 Predictive margins

Figure 3 estimates and plots predictive margins illustrating the effect of a tweet on behavior at different points across the political spectrum, along with a linear interaction fit, separately for Republican and Democratic states. In this section, we consider several extensions to this analysis. Firstly, in Figure SI-10 we plot the predictive margins for the full sample, either unweighted (Panel A) or weighted by county-level population (Panel B). We also overlay histograms of the density of Trump margin, as well as binned plots that provide a semi-parametric visualization of county-specific political heterogeneity that allows us to relax to the linearity assumption.

In Panel A, consistent with the negative and significant interaction term in Table 2 Panel A, column (2), there is a negative slope in the linear fit—areas with greater Trump share do experience lower marginal effects of the tweet. This is consistent with the binned estimates, which lie relatively close to the linear estimate. In Panel B, we re-weight by county-level population and find that the slope of the linear fit remains negative, though it is flatter. This is because the binned estimates suggest non-linearity of the effects in Trump vote margin. Re-weighting has introduced substantial nonlinearities which make interpretation of the linear results more problematic. For a more extensive discussion on the role of reweighting, see Appendix D.6.

In Figure SI-11, we relax the linearity assumption entirely and re-estimate the predictive margins on the unweighted sample with a nonparametric kernel regression. Because the kernel regression is highly sensitive to sparse data at the boundaries, we exclude counties below a Trump margin of -0.5 and above 0.75, or 5% of the data. Firstly, we find evidence of substantial nonlinearities. In Democratic counties, the largest effects obtain in areas that overwhelmingly supported Clinton—where the data is relatively sparse—and in swing counties approaching a margin of zero. In contrast, the effects are smaller in solidly Democratic areas that are nonetheless not extremely to the left. On the Republican side, we find that the effects are largest in swing counties, and after which they are essentially monotonic in Trump share. Overall, despite the obvious nonlinearities, the nonparametric curve generally slopes downward, suggesting that the overall the linearity assumption is reasonable.

Figure SI-10: Predictive margins: effect of “stay home” tweet by Trump vote share, full sample

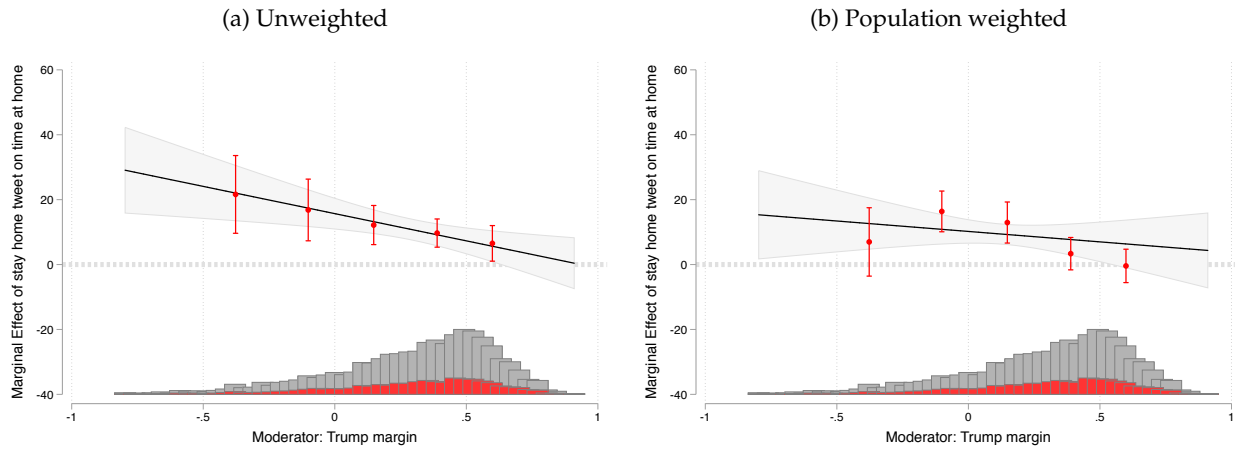

**Note:** Figure shows predicted values and 95% confidence intervals from a county-level regression of median time at home on the treatment indicator, its interaction with Donald Trump’s county-level vote share in the 2016 presidential election, county and day fixed effects, as well as day fixed effects interacted with control variables and Trump’s 2016 margin, see Table 2 Panel A. Estimates are unweighted (Panel A) or weighted by county population (Panel B). The treatment is a dummy variable equaling 1 for all days after a governor issues their first tweet encouraging citizens to stay at home. We estimate the model separately for states with Democratic (Panel A) and Republican (Panel B) governors. The fitted line shows the linear marginal effect of the treatment at different levels of Trump vote share. The points with 95% confidence intervals show semi-parametric estimates of the marginal effect of the treatment at five different bins of Trump vote share. Bins are (-1,-0.25), (0.25, 0), (0, 0.25), and (0.25, 0.5). The histogram below the predicted margins displays the density of the county-level Trump vote margin by treatment status (red is treated, grey is untreated). Figure uses the INTERFLEX package from Hainmueller et al. (20).

Figure SI-11: Predictive margins: effect of “stay home” tweet by Trump vote share, full sample, nonparametric estimation

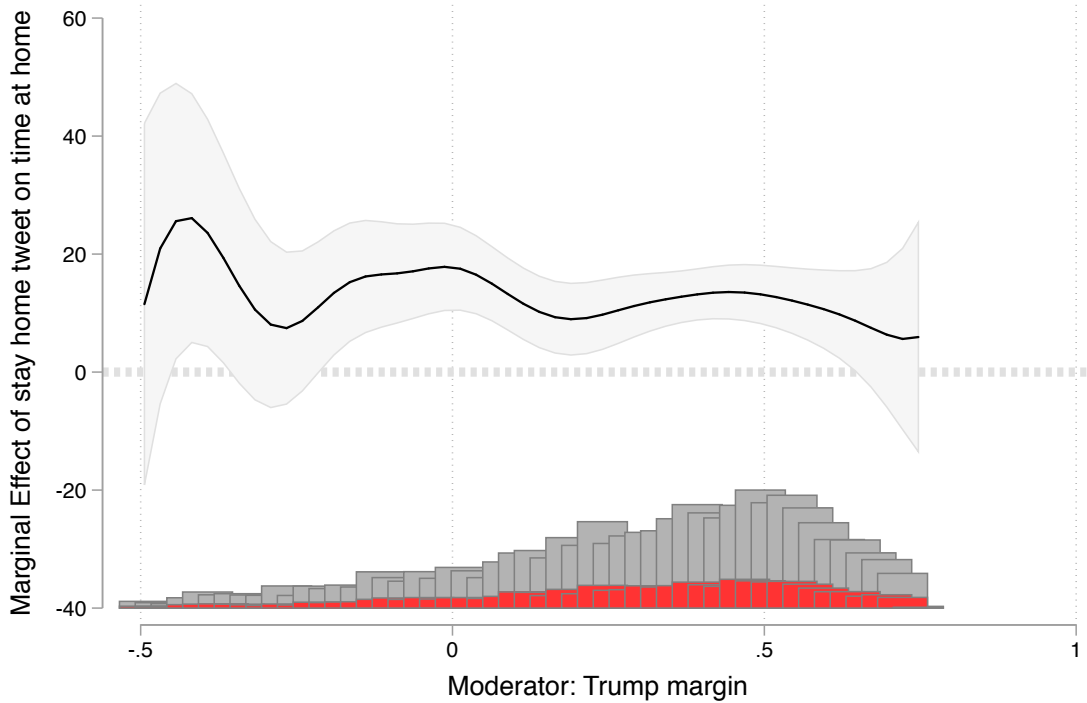

**Note:** Figure shows predicted values and 95% confidence intervals from a county-level, population-weighted regression of median time at home on the treatment indicator, its interaction with Donald Trump’s county-level vote share in the 2016 presidential election, county and day fixed effects, as well as day fixed effects interacted with control variables and Trump’s 2016 margin. The treatment is a dummy variable equaling 1 for all days after a governor issues their first tweet encouraging citizens to stay at home. We estimate the model separately for states with Democratic (Panel A) and Republican (Panel B) governors. The fitted trend shows the non-parametric kernel estimate of the marginal effect of the treatment at different levels of Trump vote share. The histogram below the predicted margins displays the density of the county-level Trump vote margin by treatment status (red is treated, grey is untreated). Sample is trimmed to Trump margin between -0.5 and 0.75, or 95% of the data. Figure uses the INTERFLEX package from Hainmueller et al. (20).

## D Supplementary results and robustness tests

### D.1 Additional results

In this section, we consider two additional results that support the conclusions of Section 3. Firstly, in Table SI-1 we estimate the primary differences-in-differences regression using Google search interest for the terms “stay at home” (Panel A) and “shelter in place” (Panel B) as the outcome variables. The results in column (1) indicate that tweets about staying home do significantly increase search interest for both of these terms in the full sample of metro-areas. Columns (2)-(4) test whether these effects differ by partisan affiliation. We do not find the interaction between the treatment and Trump’s 2016 metro-area-level vote margin to be significant, although in both panels it is of the correct sign. Splitting the sample by local partisan affiliation reveals that Democratic and Republican metro-areas are essentially equally likely to search for “stay at home” following a stay home tweet by the governor. However, Panel B reveals that for “shelter in place” search interest, the coefficient in the Democratic sub-sample is over twice as large, providing more suggestive evidence that Democrats respond more to calls for voluntary social distancing than Republicans. The interaction estimates in columns (5) and (6) do indicate smaller effects under Republican governors, a pattern more pronounced in Democratic metro areas. However, these estimates are not significant.

Table SI-2 tests the hypothesis that the response to governors’ tweets should vary over time, in particular that behavior should respond more the voluntary period before an official stay at home order is issued. We split the sample by periods before a state-level stay home order (columns 1-4) and after (columns 5-8), and re-estimate the main difference-in-differences regression that uses time at home as the outcome variable. We also consider whether these effects differ by how the treatment is defined; we consider our main post-treatment indicator, as well as cumulative tweets in the past 1, 3, or 5 days. In general – and consistent with the event-study results – we find that effects materialize both before and after a stay home order. However, the effects of recent tweets – as measured by cumulative tweets in the past 1, 3, or 5 days – are measurably larger in magnitude in the pre-order voluntary period, as expected. In contrast, the treatment indicator results are greater in the post-period, consistent with the dynamic event study results of Appendix C.4 that the response to the first tweet peaks 10-11 days after it is issued.

Lastly, in Table SI-3 we re-estimate the main results of Table 2, splitting the sample not by county-level partisanship but instead at the state-level by the governor’s partisan identity. Panel A estimates the main regression (columns 1, 3), and interaction with Trump’s county-level margin (columns 2, 4) for Democratic governors, while Panel B does so for Republican. Across both outcome variables,

the main effect is similar in magnitude among Democratic and Republican governors. However, the interaction effects differ starkly. In Panel A, the interaction term is mildly positive but insignificant, suggesting minimal partisan differentiation in response when a tweet is issued by a Democratic governor. In contrast, there is large and significant partisan differentiation in responses under Republican governors: Republicans are far less likely to respond than Democrats. The level coefficients in Panel B columns 2 and 4 imply that by far the most responsive groups are Democrats in Republican states.

Table SI-1: Governors' tweets and Google searches

| Metro-area Party                                       | All     |         | Dem     | GOP     | Dem      | GOP      |
|--------------------------------------------------------|---------|---------|---------|---------|----------|----------|
|                                                        | (1)     | (2)     | (3)     | (4)     | (5)      | (6)      |
| <i>Panel A: Search interest for "stay at home"</i>     |         |         |         |         |          |          |
| Post stay home message                                 | 0.108** | 0.115** | 0.127** | 0.109** | 0.164*** | 0.141*** |
|                                                        | (0.032) | (0.035) | (0.038) | (0.034) | (0.043)  | (0.036)  |
| Post stay home message × Trump vote share              |         | -0.004  |         |         |          |          |
|                                                        |         | (0.006) |         |         |          |          |
| Post stay home message × GOP governor                  |         |         |         |         | -0.086   | -0.068   |
|                                                        |         |         |         |         | (0.063)  | (0.060)  |
| DMA FE                                                 | Yes     | Yes     | Yes     | Yes     | Yes      | Yes      |
| Day FE                                                 | Yes     | Yes     | Yes     | Yes     | Yes      | Yes      |
| Trump margin × Day FE                                  | Yes     | Yes     | Yes     | Yes     | Yes      | Yes      |
| GOP gov × Day FE                                       | No      | No      | No      | No      | Yes      | Yes      |
| Observations                                           | 6262    | 6262    | 1643    | 4619    | 1643     | 4619     |
| R <sup>2</sup>                                         | 0.413   | 0.413   | 0.430   | 0.421   | 0.442    | 0.432    |
| <i>Panel B: Search interest for "shelter in place"</i> |         |         |         |         |          |          |
| Post stay home message                                 | 0.197** | 0.271** | 0.328*  | 0.151*  | 0.375*   | 0.212*   |
|                                                        | (0.069) | (0.095) | (0.141) | (0.058) | (0.146)  | (0.090)  |
| Post stay home message × Trump vote share              |         | -0.049  |         |         |          |          |
|                                                        |         | (0.028) |         |         |          |          |
| Post stay home message × GOP governor                  |         |         |         |         | -0.290   | -0.110   |
|                                                        |         |         |         |         | (0.182)  | (0.120)  |
| DMA FE                                                 | Yes     | Yes     | Yes     | Yes     | Yes      | Yes      |
| Day FE                                                 | Yes     | Yes     | Yes     | Yes     | Yes      | Yes      |
| Trump margin × Day FE                                  | Yes     | Yes     | Yes     | Yes     | Yes      | Yes      |
| GOP gov × Day FE                                       | No      | No      | No      | No      | Yes      | Yes      |
| Observations                                           | 6262    | 6262    | 1643    | 4619    | 1643     | 4619     |
| R <sup>2</sup>                                         | 0.409   | 0.413   | 0.493   | 0.385   | 0.521    | 0.398    |

Standard errors clustered at the state level. Sample is 6,262 metro-area-days over the period March 1-March 31 2020. Outcome variable is Google search interest in the term "stay at home" or "shelter in place" relative to reference point, as indicated in the panel header. Treatment indicator equals one in all periods after the governor of state  $s$  issues a tweet encouraging citizens to stay home. All specifications include interactions between the 2016 Trump margin and day fixed effects. \*\*\*  $p < 0.01$ , \*\*  $p < 0.05$ , \*  $p < 0.1$ .

Table SI-2: Governors' tweets before and after stay home orders

| Outcome<br>Period                     | Median time at home |                     |                      |                    |                      |                     |                     |                     |
|---------------------------------------|---------------------|---------------------|----------------------|--------------------|----------------------|---------------------|---------------------|---------------------|
|                                       | Pre-stay home order |                     |                      |                    | Post stay-home order |                     |                     |                     |
|                                       | (1)                 | (2)                 | (3)                  | (4)                | (5)                  | (6)                 | (7)                 | (8)                 |
| Cumulative stay home messages, 3 days | 2.713***<br>(0.828) |                     |                      |                    | 0.423<br>(0.394)     |                     |                     |                     |
| Cumulative stay home messages, 5 days |                     | 2.300***<br>(0.689) |                      |                    |                      | 1.141***<br>(0.316) |                     |                     |
| Post stay home message                |                     |                     | 11.739***<br>(3.418) |                    |                      |                     | 11.023**<br>(5.407) |                     |
| Stay home messages, $t - 1$           |                     |                     |                      | 3.658**<br>(1.759) |                      |                     |                     | 1.381***<br>(0.461) |
| County FE                             | Yes                 | Yes                 | Yes                  | Yes                | Yes                  | Yes                 | Yes                 | Yes                 |
| Day FE                                | Yes                 | Yes                 | Yes                  | Yes                | Yes                  | Yes                 | Yes                 | Yes                 |
| Demographics $\times$ Day FE          | Yes                 | Yes                 | Yes                  | Yes                | Yes                  | Yes                 | Yes                 | Yes                 |
| Trump margin $\times$ Day FE          | Yes                 | Yes                 | Yes                  | Yes                | Yes                  | Yes                 | Yes                 | Yes                 |
| COVID controls                        | Yes                 | Yes                 | Yes                  | Yes                | Yes                  | Yes                 | Yes                 | Yes                 |
| Other tweets                          | Yes                 | Yes                 | Yes                  | Yes                | Yes                  | Yes                 | Yes                 | Yes                 |
| Observations                          | 79329               | 79329               | 79329                | 76230              | 15361                | 15361               | 15361               | 15360               |
| $R^2$                                 | 0.982               | 0.982               | 0.982                | 0.982              | 0.993                | 0.993               | 0.993               | 0.993               |

Standard errors clustered at the state level. Sample is 94,690 county-days over the period March 1-March 31, 2020. Treatment indicator equals one for all days after the governor of state  $s$  issues a tweet about staying home, or is the cumulative number of tweets in a given period, as indicated in the Table. County-level demographic controls are median age, log household income, population density, share of population over 65, share black, share Hispanic, and share male. "COVID controls" include controls for county-level confirmed cases and state-level COVID-19 deaths. "Other tweets" includes controls for post-COVID and social distancing related tweets. \*\*\*  $p < 0.01$ , \*\*  $p < 0.05$ , \*  $p < 0.1$ .

Table SI-3: Governors' stay home tweets and mobility, by governor's party

| Outcome                                           | Median time at home  |                      | Log time at home    |                     |
|---------------------------------------------------|----------------------|----------------------|---------------------|---------------------|
|                                                   | (1)                  | (2)                  | (3)                 | (4)                 |
| <i>Panel A: Democratic governors</i>              |                      |                      |                     |                     |
| Post stay home message                            | 12.768***<br>(3.111) | 10.222**<br>(4.348)  | 0.024**<br>(0.009)  | 0.007<br>(0.012)    |
| Post stay home message $\times$ Trump vote margin |                      | 1.039<br>(0.871)     |                     | 0.007**<br>(0.003)  |
| Observations                                      | 42750                | 42750                | 42750               | 42750               |
| $R^2$                                             | 0.983                | 0.983                | 0.997               | 0.997               |
| <i>Panel B: Republican governors</i>              |                      |                      |                     |                     |
| Post stay home message                            | 5.609<br>(4.905)     | 20.413***<br>(7.117) | 0.040***<br>(0.013) | 0.068***<br>(0.021) |
| Post stay home message $\times$ Trump vote margin |                      | -3.703***<br>(0.902) |                     | -0.007*<br>(0.004)  |
| Observations                                      | 51940                | 51940                | 51940               | 51940               |
| $R^2$                                             | 0.985                | 0.985                | 0.998               | 0.998               |
| County FE                                         | Yes                  | Yes                  | Yes                 | Yes                 |
| Day FE                                            | Yes                  | Yes                  | Yes                 | Yes                 |
| Demographics $\times$ Day FE                      | Yes                  | Yes                  | Yes                 | Yes                 |
| Trump margin $\times$ Day FE                      | Yes                  | Yes                  | Yes                 | Yes                 |
| COVID controls                                    | Yes                  | Yes                  | Yes                 | Yes                 |
| Other tweets                                      | Yes                  | Yes                  | Yes                 | Yes                 |
| Orders                                            | Yes                  | Yes                  | Yes                 | Yes                 |

Standard errors clustered at the state level. Sample is 94,690 county-days over the period March 1-March 31 2020. Treatment indicator equals one for all days after the governor of state  $s$  issues a tweet about social distancing. "Trump vote margin" is county  $i$ 's vote margin for Donald Trump in the 2016 presidential election. Republican counties are those in which Trump's vote margin in 2016 was greater than zero. County-level demographic controls are median age, log household income, population density, share of population over 65, share black, share Hispanic, and share male. "COVID controls" include controls for county-level confirmed cases and state-level COVID-19 deaths. "Other tweets" includes controls for post-COVID and social distancing related tweets. "Orders" includes controls for whether the state has issued the following types of orders: emergency declarations, banning large gatherings, school closures, restaurant/bar closures, non-essential business closures, and stay-at-home orders. \*\*\*  $p < 0.01$ , \*\*  $p < 0.05$ , \*  $p < 0.1$ .

## D.2 Robustness to occupational, income, density, and media controls

We find in Tables 2 and SI-3 that Trump-supporting counties are less likely to respond to governors' stay at home messaging, and that this relationship is more pronounced under Republican governors. However, political conservatism may be correlated with omitted variables that influence the responsiveness to messaging. In particular, these counties may be poorer, less dense, or have different occupational composition, which may effect the extent to which individuals can adjust their mobility behavior in response to messaging. In this case, we must include these variables interacted with the treatment variable itself.

In Table SI-4, we consider the robustness of the main results to controlling for the interaction between the treatment variable and several covariates, including the share of the working-age population employed in retail, service, and manufacturing occupations, the log of household income, and population density. In Panel A we consider the full sample, while Panels B and C consider the sample of states with Democratic and Republican governors, respectively. Columns 1 and 2 compare the main estimates with and without occupational controls, column 3 re-prints the main interaction specification with Trump margin, while columns 4-8 include the interaction of each of these covariates with the treatment. We re-center these covariates around their sample median, so that the level effect of the treatment variable can be interpreted as the daily effect of the stay home tweet in a county where Trump's margin is zero and the covariate is set to its median value.

Panel A shows that for each specification, Trump-supporting counties remain significantly less likely to comply with stay home messaging, and these interaction coefficients are remarkably stable. The pattern of results holds in Panels B and C as well: the interaction with Trump margin remains positive and insignificant under Democratic governors, but negative and significant under Republican governors. None of the covariates interactions are significant at conventional levels. Neither the main nor differential effects are driven by income, density, or employment composition.

In Table SI-5, we estimate robustness of the main results to controlling for the interaction between the treatment variable and covariates measuring TV and social media exposure from the 2018 Cooperative Congressional Election Study, including the share of the population getting news from TV, cable news, and social media, as well as the share of the population getting political news from social media. The sample for which these data are available is only 81,947 county-days. The main interaction effects are smaller in magnitude and no longer significant (Panel A), though the comparison between columns 3 and 4-7 reveal that this is driven by the restricted sample rather than endogeneity of partisanship. The differential effects by governors' party remain significant (Panels B and C).



Table SI-4: Governors' stay home tweets and mobility, robustness to covariates

| Outcome                                       | Median time at home  |                      |                      |                      |                      |                      |                      |                      |
|-----------------------------------------------|----------------------|----------------------|----------------------|----------------------|----------------------|----------------------|----------------------|----------------------|
|                                               | (1)                  | (2)                  | (3)                  | (4)                  | (5)                  | (6)                  | (7)                  | (8)                  |
| <i>Panel A: Full sample</i>                   |                      |                      |                      |                      |                      |                      |                      |                      |
| Post stay home message                        | 10.409***<br>(3.542) | 10.489***<br>(3.587) | 15.694***<br>(4.697) | 15.465***<br>(4.743) | 15.433***<br>(4.736) | 15.619***<br>(4.671) | 15.897***<br>(4.809) | 15.175***<br>(4.731) |
| Post stay home message × Trump vote margin    |                      |                      | -1.679**<br>(0.707)  | -1.596**<br>(0.706)  | -1.584**<br>(0.720)  | -1.777**<br>(0.686)  | -1.687**<br>(0.706)  | -1.536**<br>(0.721)  |
| Post stay home message × Share retail         |                      |                      |                      | 1.016<br>(0.730)     |                      |                      |                      |                      |
| Post stay home message × Share service        |                      |                      |                      |                      | 0.074<br>(0.530)     |                      |                      |                      |
| Post stay home message × Share manufacturing  |                      |                      |                      |                      |                      | 0.541<br>(0.327)     |                      |                      |
| Post stay home message × Log household income |                      |                      |                      |                      |                      |                      | -6.877<br>(8.425)    |                      |
| Post stay home message × Population density   |                      |                      |                      |                      |                      |                      |                      | 0.002<br>(0.003)     |
| Observations                                  | 94690                | 94690                | 94690                | 94690                | 94690                | 94690                | 94690                | 94690                |
| R <sup>2</sup>                                | 0.984                | 0.984                | 0.984                | 0.984                | 0.984                | 0.984                | 0.984                | 0.984                |
| <i>Panel B: Democratic governors</i>          |                      |                      |                      |                      |                      |                      |                      |                      |
| Post stay home message                        | 12.768***<br>(3.111) | 12.395***<br>(3.086) | 10.222**<br>(4.348)  | 9.910**<br>(4.356)   | 8.834*<br>(4.697)    | 9.999**<br>(4.329)   | 8.742*<br>(4.335)    | 7.925*<br>(4.328)    |
| Post stay home message × Trump vote margin    |                      |                      | 1.039<br>(0.871)     | 1.021<br>(0.856)     | 1.170<br>(0.884)     | 0.972<br>(0.870)     | 1.281<br>(0.876)     | 1.503<br>(0.881)     |
| Post stay home message × Share retail         |                      |                      |                      | -0.123<br>(0.849)    |                      |                      |                      |                      |
| Post stay home message × Share service        |                      |                      |                      |                      | 0.885<br>(0.706)     |                      |                      |                      |
| Post stay home message × Share manufacturing  |                      |                      |                      |                      |                      | 0.112<br>(0.397)     |                      |                      |
| Post stay home message × Log household income |                      |                      |                      |                      |                      |                      | 8.764<br>(8.378)     |                      |
| Post stay home message × Population density   |                      |                      |                      |                      |                      |                      |                      | 0.007**<br>(0.003)   |
| Observations                                  | 42750                | 42750                | 42750                | 42750                | 42750                | 42750                | 42750                | 42750                |
| R <sup>2</sup>                                | 0.983                | 0.983                | 0.983                | 0.983                | 0.983                | 0.983                | 0.983                | 0.983                |
| <i>Panel C: Republican governors</i>          |                      |                      |                      |                      |                      |                      |                      |                      |
| Post stay home message                        | 5.609<br>(4.905)     | 5.233<br>(4.968)     | 20.413***<br>(7.117) | 19.496**<br>(7.218)  | 19.903**<br>(7.382)  | 19.048**<br>(7.235)  | 18.981***<br>(6.642) | 21.088***<br>(7.215) |
| Post stay home message × Trump vote margin    |                      |                      | -3.703***<br>(0.902) | -3.624***<br>(0.923) | -3.709***<br>(0.965) | -3.701***<br>(0.885) | -3.509***<br>(0.849) | -3.889***<br>(0.882) |
| Post stay home message × Share retail         |                      |                      |                      | 1.689*<br>(0.876)    |                      |                      |                      |                      |
| Post stay home message × Share service        |                      |                      |                      |                      | -0.160<br>(0.851)    |                      |                      |                      |
| Post stay home message × Share manufacturing  |                      |                      |                      |                      |                      | 0.517*<br>(0.300)    |                      |                      |
| Post stay home message × Log household income |                      |                      |                      |                      |                      |                      | -19.837<br>(12.242)  |                      |
| Post stay home message × Population density   |                      |                      |                      |                      |                      |                      |                      | -0.011<br>(0.016)    |
| Observations                                  | 51940                | 51940                | 51940                | 51940                | 51940                | 51940                | 51940                | 51940                |
| R <sup>2</sup>                                | 0.985                | 0.985                | 0.985                | 0.985                | 0.985                | 0.985                | 0.985                | 0.985                |
| Trump margin × Day FE                         | Yes                  |
| Demographics × Day FE                         | Yes                  |
| Occupation shares × Day FE                    | No                   | Yes                  | No                   | Yes                  | Yes                  | Yes                  | Yes                  | Yes                  |
| COVID controls                                | Yes                  |
| Other tweets                                  | Yes                  |
| Orders                                        | Yes                  |

Standard errors clustered at the state level. Sample is 94,690 county-days over the period March 1-March 31 2020. Treatment indicator equals one for all days after the governor of state  $s$  issues a tweet about social distancing. "Trump vote margin" is county  $i$ 's vote margin for Donald Trump in the 2016 presidential election. Republican counties are those in which Trump's vote margin in 2016 was greater than zero. All other variables interacted with the treatment indicator are centered around their county-level median values. County-level demographic controls are median age, log household income, population density, share of population over 65, share black, share Hispanic, and share male. Occupation shares are the county-level employment shares of retail, services, and manufacturing workers. "COVID controls" include controls for county-level confirmed cases and state-level COVID-19 deaths. "Other tweets" includes controls for post-COVID and social distancing related tweets. "Orders" includes controls for whether the state has issued the following types of orders: emergency declarations, banning large gatherings, school closures, restaurant/bar closures, non-essential business closures, and stay-at-home orders. \*\*\*  $p < 0.01$ , \*\*  $p < 0.05$ , \*  $p < 0.1$ .

Table SI-5: Governors' stay home tweets and mobility, robustness to media exposure

| Outcome                                              | Median time at home  |                      |                      |                      |                      |                      |                      |
|------------------------------------------------------|----------------------|----------------------|----------------------|----------------------|----------------------|----------------------|----------------------|
|                                                      | (1)                  | (2)                  | (3)                  | (4)                  | (5)                  | (6)                  | (7)                  |
| <i>Panel A: Full sample</i>                          |                      |                      |                      |                      |                      |                      |                      |
| Post stay home message                               | 13.262***<br>(3.746) | 13.357***<br>(3.732) | 17.052***<br>(4.736) | 17.073***<br>(4.717) | 17.343***<br>(4.710) | 16.937***<br>(4.803) | 17.144***<br>(4.713) |
| Post stay home message × Trump vote margin           |                      |                      | -1.285*<br>(0.764)   | -1.303*<br>(0.769)   | -1.324*<br>(0.766)   | -1.266<br>(0.777)    | -1.276<br>(0.767)    |
| Post stay home message × TV news share               |                      |                      |                      | -0.032<br>(0.047)    |                      |                      |                      |
| Post stay home message × Cable news share            |                      |                      |                      |                      | -0.090*<br>(0.051)   |                      |                      |
| Post stay home message × Social media share          |                      |                      |                      |                      |                      | -0.040<br>(0.075)    |                      |
| Post stay home message × Social media politics share |                      |                      |                      |                      |                      |                      | -0.056<br>(0.050)    |
| Observations                                         | 81947                | 81947                | 81947                | 81947                | 81947                | 81947                | 81947                |
| R <sup>2</sup>                                       | 0.988                | 0.988                | 0.988                | 0.988                | 0.988                | 0.988                | 0.988                |
| <i>Panel B: Democratic governors</i>                 |                      |                      |                      |                      |                      |                      |                      |
| Post stay home message                               | 15.555***<br>(3.581) | 15.532***<br>(3.538) | 12.774***<br>(4.284) | 12.998***<br>(4.207) | 12.767***<br>(4.185) | 12.739***<br>(4.382) | 12.808***<br>(4.217) |
| Post stay home message × Trump vote margin           |                      |                      | 1.201<br>(0.751)     | 1.220<br>(0.757)     | 1.187<br>(0.744)     | 1.182<br>(0.757)     | 1.178<br>(0.763)     |
| Post stay home message × TV news share               |                      |                      |                      | 0.068<br>(0.072)     |                      |                      |                      |
| Post stay home message × Cable news share            |                      |                      |                      |                      | 0.020<br>(0.070)     |                      |                      |
| Post stay home message × Social media share          |                      |                      |                      |                      |                      | -0.014<br>(0.113)    |                      |
| Post stay home message × Social media politics share |                      |                      |                      |                      |                      |                      | -0.004<br>(0.064)    |
| Observations                                         | 37995                | 37995                | 37995                | 37995                | 37995                | 37995                | 37995                |
| R <sup>2</sup>                                       | 0.987                | 0.987                | 0.987                | 0.987                | 0.987                | 0.987                | 0.987                |
| <i>Panel C: Republican governors</i>                 |                      |                      |                      |                      |                      |                      |                      |
| Post stay home message                               | 7.632<br>(5.036)     | 7.609<br>(4.990)     | 19.079**<br>(7.614)  | 18.804**<br>(7.548)  | 19.237**<br>(7.533)  | 19.023**<br>(7.771)  | 19.124**<br>(7.530)  |
| Post stay home message × Trump vote margin           |                      |                      | -3.042**<br>(1.097)  | -3.085***<br>(1.096) | -3.091***<br>(1.094) | -3.048**<br>(1.132)  | -3.041**<br>(1.111)  |
| Post stay home message × TV news share               |                      |                      |                      | -0.099*<br>(0.055)   |                      |                      |                      |
| Post stay home message × Cable news share            |                      |                      |                      |                      | -0.152**<br>(0.064)  |                      |                      |
| Post stay home message × Social media share          |                      |                      |                      |                      |                      | -0.021<br>(0.096)    |                      |
| Post stay home message × Social media politics share |                      |                      |                      |                      |                      |                      | -0.056<br>(0.074)    |
| Observations                                         | 43952                | 43952                | 43952                | 43952                | 43952                | 43952                | 43952                |
| R <sup>2</sup>                                       | 0.989                | 0.989                | 0.989                | 0.989                | 0.989                | 0.989                | 0.989                |
| Trump margin × Day FE                                | Yes                  |
| Demographics × Day FE                                | Yes                  |
| Occupation shares × Day FE                           | No                   | Yes                  | No                   | Yes                  | Yes                  | Yes                  | Yes                  |
| COVID controls                                       | Yes                  |
| Other tweets                                         | Yes                  |
| Orders                                               | Yes                  |

Standard errors clustered at the state level. Sample is 81,947 county-days over the period March 1-March 31 2020 for which CCES media exposure data is available. Treatment indicator equals one for all days after the governor of state  $s$  issues a tweet about social distancing. "Trump vote margin" is county  $i$ 's vote margin for Donald Trump in the 2016 presidential election. Republican counties are those in which Trump's vote margin in 2016 was greater than zero. All other variables interacted with the treatment indicator are centered around their county-level median values. County-level demographic controls are median age, log household income, population density, share of population over 65, share black, share Hispanic, and share male. Occupation shares are the county-level employment shares of retail, services, and manufacturing workers. "COVID controls" include controls for county-level confirmed cases and state-level COVID-19 deaths. "Other tweets" includes controls for post-COVID and social distancing related tweets. "Orders" includes controls for whether the state has issued the following types of orders: emergency declarations, banning large gatherings, school closures, restaurant/bar closures, non-essential business closures, and stay-at-home orders. \*\*\*  $p < 0.01$ , \*\*  $p < 0.05$ , \*  $p < 0.1$ .

### D.3 Other outcome variables

Recall that time spent at home is likely to be the best proxy of stay home behavior, since distance traveled may be biased by population density while share home all day is unlikely to fall below some minimum floor since individuals must continue to conduct essential business. However, in Table [SI-6](#), we consider the robustness of the main results to different outcome variables, including the share of devices geolocated at home for the entire day (columns 1-2) and log of distance traveled (columns 3-4).

In Panel A, we find that governors' tweets about staying home increase the share of devices at home by 0.18 percentage points per day, and reduce distance traveled by 4.2%, the latter effect being significant at the 5% level. Column 2 shows a significant negative interaction between Trump's 2016 margin and the treatment, supporting the result that Republicans are less likely to respond to governors' communications. This interpretation is also supported by the results of Panel B, where the coefficient for stay home messaging are now significant in the Democratic sample (column 1) and more than 5 times the magnitude of the insignificant coefficient for Republican counties (column 2). In Panel C, we find some evidence that the triple-interaction effects observed in Table [2](#) carry over to these other outcome variables, though the the triple-interaction terms are not significant. Overall, the finding that tweets matter, and differentially so by county partisan lean, appears robust. However, the final finding that these effects vary depending on identity of the governor holds only for the median time at home outcomes.

Table SI-6: Governors' tweets, partisanship, and mobility, robustness to different outcome variables

| Outcome                                                   | Share home all day   |                      | Log distance traveled |                     |
|-----------------------------------------------------------|----------------------|----------------------|-----------------------|---------------------|
|                                                           | (1)                  | (2)                  | (3)                   | (4)                 |
| <i>Panel A: Full sample</i>                               |                      |                      |                       |                     |
| Post stay home message                                    | 0.186<br>(0.278)     | 0.778**<br>(0.339)   | -0.042**<br>(0.017)   | -0.025<br>(0.019)   |
| Post stay home message × Trump vote margin                |                      | -0.188***<br>(0.054) |                       | -0.006<br>(0.004)   |
| Observations                                              | 94690                | 94690                | 94690                 | 94690               |
| R <sup>2</sup>                                            | 0.990                | 0.990                | 0.999                 | 0.999               |
| <i>Panel B: By county party</i>                           |                      |                      |                       |                     |
| County party                                              | Dem                  | GOP                  | Dem                   | GOP                 |
| Post stay home message                                    | 1.035***<br>(0.338)  | 0.206<br>(0.284)     | -0.030*<br>(0.017)    | -0.039**<br>(0.016) |
| Observations                                              | 14708                | 79982                | 14708                 | 79982               |
| R <sup>2</sup>                                            | 0.993                | 0.989                | 0.999                 | 0.999               |
| <i>Panel C: Triple interactions</i>                       |                      |                      |                       |                     |
| Post stay home message                                    | 1.024**<br>(0.426)   | 1.475***<br>(0.529)  | -0.026<br>(0.016)     | -0.014<br>(0.023)   |
| Post stay home message × GOP governor                     | -0.464<br>(0.697)    | -0.400<br>(1.127)    | -0.003<br>(0.032)     | -0.018<br>(0.039)   |
| Post stay home message × Trump vote margin                | -0.236***<br>(0.081) |                      | -0.003<br>(0.004)     |                     |
| Post stay home message × GOP governor × Trump vote margin | 0.074<br>(0.119)     |                      | -0.003<br>(0.006)     |                     |
| Post stay home message × GOP county                       |                      | -1.306***<br>(0.466) |                       | -0.021<br>(0.026)   |
| Post stay home message × GOP governor × GOP county        |                      | -0.191<br>(1.034)    |                       | -0.012<br>(0.044)   |
| GOP county × Day FE                                       | No                   | Yes                  | No                    | Yes                 |
| Trump margin × Day FE                                     | Yes                  | No                   | Yes                   | No                  |
| GOP gov × Day FE                                          | Yes                  | Yes                  | Yes                   | Yes                 |
| GOP county × GOP gov × Day FE                             | No                   | Yes                  | No                    | Yes                 |
| Trump margin × GOP gov × Day FE                           | Yes                  | No                   | Yes                   | No                  |
| Observations                                              | 94690                | 94690                | 94690                 | 94690               |
| R <sup>2</sup>                                            | 0.990                | 0.990                | 0.999                 | 0.999               |
| County FE                                                 | Yes                  | Yes                  | Yes                   | Yes                 |
| Day FE                                                    | Yes                  | Yes                  | Yes                   | Yes                 |
| Demographics × Day FE                                     | Yes                  | Yes                  | Yes                   | Yes                 |
| Trump margin × Day FE                                     | Yes                  | Yes                  | Yes                   | Yes                 |
| COVID controls                                            | Yes                  | Yes                  | Yes                   | Yes                 |
| Other tweets                                              | Yes                  | Yes                  | Yes                   | Yes                 |
| Orders                                                    | Yes                  | Yes                  | Yes                   | Yes                 |

Standard errors in parentheses clustered at the state level. Sample is 93,030 county-days over the period March 1-March 31 2020 for which electoral data is available. Treatment indicator equals one for all days after the governor of state  $s$  issues a tweet encouraging citizens to stay home. "Trump vote margin" is county  $i$ 's vote margin for Donald Trump in the 2016 presidential election. GOP counties are those in which the Republican vote margin in the 2016 presidential election was greater than 5%. County-level demographic controls are median age, log household income, population density, share of population over 65, share black, share Hispanic, and share male. "Orders" includes controls for whether the state has issued the following types of orders: emergency declarations, banning large gatherings, school closures, restaurant/bar closures, non-essential business closures, and stay-at-home orders. Footer at the bottom of the table refers to all specifications, while the footer after Panel C refers only to that panel. \*\*\*  $p < 0.01$ , \*\*  $p < 0.05$ , \*  $p < 0.1$ .

## D.4 Definition of treatment variable

Throughout the paper, we exploit a “staggered adoption” differences-in-differences design where the treatment indicator if interest equals one in all periods after the governor initial issues a stay at home tweet. In this section we consider the robustness of the main results to different definitions of the treatment variable. We begin in Table [SI-7](#) by investigating whether the main effects differ when we consider tweets that recommend social distancing, but fall short of calling on citizens to stay home. As Figure [1](#) makes clear, these communications typically precede those about staying at home, and are therefore also of interest in understanding changes in voluntary social distancing behavior in the earliest phase of the pandemic.

In Table [SI-7](#) we compare the magnitude of the behavior change induced by a social distancing tweet to that of the stay home tweet across our 4 outcome variables. First, we find that social distancing tweets also substantially reduce mobility (columns 2, 5, 8, 11), an effect that is significant for all outcomes except the share of devices home all day. In magnitudes, the first tweet about social distancing increases median time at home by 14.5 minutes per day. Furthermore, in columns 3,6,9,12 we include both treatment variables in the model. This does not materially affect either coefficient estimate, suggesting that the two types of tweets are largely orthogonal and that the social distancing effect occurs over and above the effect of stay home tweets. Lastly, social distancing tweets induce a larger reduction in mobility by about 3.8 minutes per day, though this difference is not statistically significant. This greater effect is likely due to the fact that governors social distancing tweets predominantly occurred during the earlier phase of the pandemic – prior to prohibitions of large gatherings and closures of schools and business – in which the scope for voluntary reduction of mobility was greater.

Having established that social distancing tweets also reduce mobility, we next consider whether these effects vary by political alignment and governors’ identity. Table [SI-8](#) replicates the main results of Table [2](#) using social distancing tweets instead of stay at home as the treatment of interest. In general, the differential effects by partisan identity and governor identity that we observe in the main results do not obtain when considering social distancing tweets. In particular, the responses does not differ by Trump’s 2016 margin (Panel A), and is similar in magnitude for Democratic vs. Republican counties (Panel B). None of the two or three-way interaction terms in Panel C are significant.

Table SI-7: Governors' tweets, by content of tweet

| Outcome                        | Median time at home  |                      |                      | Log time at home    |                     |                     | Share home all day |                  |                  | Log distance        |                     |                     |
|--------------------------------|----------------------|----------------------|----------------------|---------------------|---------------------|---------------------|--------------------|------------------|------------------|---------------------|---------------------|---------------------|
|                                | (1)                  | (2)                  | (3)                  | (4)                 | (5)                 | (6)                 | (7)                | (8)              | (9)              | (10)                | (11)                | (12)                |
| Post stay home message         | 10.648***<br>(3.875) |                      | 10.594***<br>(3.549) | 0.035***<br>(0.010) |                     | 0.035***<br>(0.009) | 0.195<br>(0.281)   |                  | 0.194<br>(0.280) | -0.043**<br>(0.018) |                     | -0.043**<br>(0.017) |
| Post social distancing message |                      | 14.518***<br>(4.266) | 14.467***<br>(3.896) |                     | 0.046***<br>(0.014) | 0.046***<br>(0.012) |                    | 0.171<br>(0.244) | 0.170<br>(0.242) |                     | -0.049**<br>(0.020) | -0.049**<br>(0.019) |
| County FE                      | Yes                  | Yes                  | Yes                  | Yes                 | Yes                 | Yes                 | Yes                | Yes              | Yes              | Yes                 | Yes                 | Yes                 |
| Day FE                         | Yes                  | Yes                  | Yes                  | Yes                 | Yes                 | Yes                 | Yes                | Yes              | Yes              | Yes                 | Yes                 | Yes                 |
| Demographics × Day FE          | Yes                  | Yes                  | Yes                  | Yes                 | Yes                 | Yes                 | Yes                | Yes              | Yes              | Yes                 | Yes                 | Yes                 |
| Trump margin × Day FE          | Yes                  | Yes                  | Yes                  | Yes                 | Yes                 | Yes                 | Yes                | Yes              | Yes              | Yes                 | Yes                 | Yes                 |
| COVID cases                    | Yes                  | Yes                  | Yes                  | Yes                 | Yes                 | Yes                 | Yes                | Yes              | Yes              | Yes                 | Yes                 | Yes                 |
| Orders                         | Yes                  | Yes                  | Yes                  | Yes                 | Yes                 | Yes                 | Yes                | Yes              | Yes              | Yes                 | Yes                 | Yes                 |
| Observations                   | 94690                | 94690                | 94690                | 94690               | 94690               | 94690               | 94690              | 94690            | 94690            | 94690               | 94690               | 94690               |
| R <sup>2</sup>                 | 0.984                | 0.984                | 0.984                | 0.997               | 0.997               | 0.997               | 0.990              | 0.990            | 0.990            | 0.999               | 0.999               | 0.999               |

Standard errors clustered at the state level. Sample is 94,690 county-days over the period March 1–March 31, 2020. Treatment indicator equals one for all days after the governor of state  $s$  issues a tweet about staying home or social distancing, as indicated in the table. County-level demographic controls are median age, log household income, population density, share of population over 65, share black, share Hispanic, and share male. "COVID controls" include controls for county-level confirmed cases and state-level COVID-19 deaths. "Orders" includes controls for whether the state has issued the following types of orders: emergency declarations, banning large gatherings, school closures, restaurant/bar closures, non-essential business closures, and stay-at-home orders. \*\*\*  $p < 0.01$ , \*\*  $p < 0.05$ , \*  $p < 0.1$ .

Table SI-8: Governors' social distancing tweets, partisanship and mobility

| Outcome                                                           | Median time at home  |                      | Log time at home    |                     |
|-------------------------------------------------------------------|----------------------|----------------------|---------------------|---------------------|
|                                                                   | (1)                  | (2)                  | (3)                 | (4)                 |
| <i>Panel A: Full sample</i>                                       |                      |                      |                     |                     |
| Post social distancing message                                    | 14.518***<br>(4.266) | 15.599***<br>(5.479) | 0.046***<br>(0.014) | 0.041**<br>(0.017)  |
| Post social distancing message × Trump vote margin                |                      | -0.327<br>(0.926)    |                     | 0.001<br>(0.003)    |
| Observations                                                      | 94690                | 94690                | 94690               | 94690               |
| R <sup>2</sup>                                                    | 0.984                | 0.984                | 0.997               | 0.997               |
| <i>Panel B: By county party</i>                                   |                      |                      |                     |                     |
| County party                                                      | Dem                  | GOP                  | Dem                 | GOP                 |
| Post social distancing message                                    | 16.152**<br>(6.341)  | 14.921***<br>(4.344) | 0.022<br>(0.020)    | 0.046***<br>(0.013) |
| Observations                                                      | 14708                | 79982                | 14708               | 79982               |
| R <sup>2</sup>                                                    | 0.985                | 0.984                | 0.997               | 0.998               |
| <i>Panel C: Triple interaction</i>                                |                      |                      |                     |                     |
| Post social distancing message                                    | 15.681**<br>(7.786)  | 16.435*<br>(8.340)   | 0.037*<br>(0.020)   | 0.045*<br>(0.026)   |
| Post social distancing message × GOP governor                     | -2.455<br>(10.268)   | 3.063<br>(12.949)    | 0.010<br>(0.032)    | 0.018<br>(0.042)    |
| Post social distancing message × Trump vote margin                | -0.931<br>(1.456)    |                      | 0.003<br>(0.004)    |                     |
| Post social distancing message × GOP governor × Trump vote margin | 1.249<br>(1.831)     |                      | -0.002<br>(0.007)   |                     |
| Post social distancing message × GOP county                       |                      | -3.283<br>(7.748)    |                     | 0.002<br>(0.022)    |
| Post social distancing message × GOP governor × GOP county        |                      | -4.721<br>(12.346)   |                     | -0.023<br>(0.041)   |
| GOP county × Day FE                                               | No                   | Yes                  | No                  | Yes                 |
| Trump margin × Day FE                                             | Yes                  | No                   | Yes                 | No                  |
| GOP gov × Day FE                                                  | Yes                  | Yes                  | Yes                 | Yes                 |
| GOP county × GOP gov × Day FE                                     | No                   | Yes                  | No                  | Yes                 |
| Trump margin × GOP gov × Day FE                                   | Yes                  | No                   | Yes                 | No                  |
| Observations                                                      | 94690                | 94690                | 94690               | 94690               |
| R <sup>2</sup>                                                    | 0.984                | 0.984                | 0.997               | 0.997               |
| County FE                                                         | Yes                  | Yes                  | Yes                 | Yes                 |
| Day FE                                                            | Yes                  | Yes                  | Yes                 | Yes                 |
| Demographics × Day FE                                             | Yes                  | Yes                  | Yes                 | Yes                 |
| Trump margin × Day FE                                             | Yes                  | Yes                  | Yes                 | Yes                 |
| COVID controls                                                    | Yes                  | Yes                  | Yes                 | Yes                 |
| Orders                                                            | Yes                  | Yes                  | Yes                 | Yes                 |

Standard errors clustered at the state level. Sample is 94,690 county-days over the period March 1-March 31 2020. Treatment indicator equals one for all days after the governor of state  $s$  issues a tweet about social distancing. "Trump vote margin" is county  $i$ 's vote margin for Donald Trump in the 2016 presidential election. Republican counties are those in which Trump's vote margin in 2016 was greater than zero. County-level demographic controls are median age, log household income, population density, share of population over 65, share black, share Hispanic, and share male. "COVID controls" include controls for county-level confirmed cases and state-level COVID-19 deaths. "Orders" includes controls for whether the state has issued the following types of orders: emergency declarations, banning large gatherings, school closures, restaurant/bar closures, non-essential business closures, and stay-at-home orders. Footer at the bottom of the table refers to all specifications, while the footer after Panel C refers only to that panel. \*\*\*  $p < 0.01$ , \*\*  $p < 0.05$ , \*  $p < 0.1$ .

## D.5 Robustness: random effects

Throughout the paper, we use a two-way fixed effects approach to estimate the coefficients of the difference-in-differences and event-study models. In this section, we consider the robustness of the main results to different estimation approach, namely, allowing for random intercepts at the county-level. Table SI-9 re-estimates the main results of Table 2 using a random-effects estimator, with day fixed effects and controls for county-level demographics, Trump margin, and COVID cases, as well as state-level COVID deaths and orders.

We find that the random effects results are generally very similar to those in Table 2, even up to magnitudes. In Panel A column 1, the effect of the governor’s stay home tweet is an increase in time home of 12.2 minutes per day, compared with 10.4 under fixed effects. This corresponds to a 3.5% increase, significant at the 1% level. In column 2, the interaction with Trump vote share is larger; a 10 percentage-point increase in Trump’s vote share reduces compliance by about 2.9 minutes per day. In contrast, this interaction coefficient is 45% smaller in magnitude, though still significant under fixed effects.

In Panel B, columns 1 and 2 reveal very similar partisanship patterns – Trump-voting counties respond less than half as much to stay at home tweets, similar in magnitude to the fixed effects result of Table 2. Lastly, in Panel C, we find similar triple-interaction effects – Trump-voting counties respond significantly less than Democratic ones under Republican governors, but not significantly differently under Democrats. Overall, Democrats under Republican governors respond the most, while Republicans under own-party governors respond the least, mirroring the fixed effects results exactly. Overall, the similarity of the results between the two estimation strategies – both qualitatively and quantitatively – suggest that assumptions over the structure of county-specific heterogeneity are not particularly important. This suggests that time-invariant county-level heterogeneity is not substantially correlated with governors’ messaging.



Table SI-9: Governors' tweets, partisanship and mobility, random effects

| Outcome                                                   | Median time at home  |                        | Log time at home    |                      |
|-----------------------------------------------------------|----------------------|------------------------|---------------------|----------------------|
|                                                           | (1)                  | (2)                    | (3)                 | (4)                  |
| <i>Panel A: Full sample</i>                               |                      |                        |                     |                      |
| Post stay home message                                    | 12.184***<br>(3.469) | 21.023***<br>(4.989)   | 0.035***<br>(0.009) | 0.046***<br>(0.011)  |
| Post stay home message × Trump vote margin                |                      | -2.878***<br>(0.942)   |                     | -0.003<br>(0.002)    |
| Observations                                              | 94690                | 94690                  | 94690               | 94690                |
| R <sup>2</sup>                                            | 0.371                | 0.373                  | 0.178               | 0.179                |
| <i>Panel B: By county party</i>                           |                      |                        |                     |                      |
| County party                                              | Dem                  | GOP                    | Dem                 | GOP                  |
| Post stay home message                                    | 23.024***<br>(6.026) | 10.891***<br>(3.338)   | 0.048***<br>(0.018) | 0.034***<br>(0.009)  |
| Observations                                              | 14708                | 79982                  | 14708               | 79982                |
| R <sup>2</sup>                                            | 0.509                | 0.381                  | 0.300               | 0.185                |
| <i>Panel C: Triple interaction</i>                        |                      |                        |                     |                      |
| Post stay home message                                    | 15.749**<br>(7.124)  | 15.910*<br>(8.413)     | 0.033*<br>(0.017)   | 0.020<br>(0.024)     |
| Post stay home message × GOP governor                     | 6.757<br>(9.887)     | 23.276*<br>(13.477)    | 0.028<br>(0.022)    | 0.092***<br>(0.030)  |
| Post stay home message × Trump vote margin                | 0.297<br>(1.529)     |                        | 0.004<br>(0.005)    |                      |
| Post stay home message × GOP governor × Trump vote margin | -4.477**<br>(1.944)  |                        | -0.013**<br>(0.005) |                      |
| Post stay home message × GOP county                       |                      | 0.610<br>(6.900)       |                     | 0.027<br>(0.022)     |
| Post stay home message × GOP governor × GOP county        |                      | -39.872***<br>(12.667) |                     | -0.127***<br>(0.031) |
| Day FE                                                    | Yes                  | Yes                    | Yes                 | Yes                  |
| Demographics                                              | Yes                  | Yes                    | Yes                 | Yes                  |
| Trump margin × Day FE                                     | Yes                  | No                     | Yes                 | No                   |
| GOP county × Day FE                                       | No                   | Yes                    | No                  | Yes                  |
| GOP gov × Day FE                                          | Yes                  | Yes                    | Yes                 | Yes                  |
| Trump margin × GOP gov × Day FE                           | Yes                  | No                     | Yes                 | No                   |
| GOP county × GOP gov × Day FE                             | No                   | Yes                    | No                  | Yes                  |
| Observations                                              | 94690                | 94690                  | 94690               | 94690                |
| R <sup>2</sup>                                            | 0.375                | 0.376                  | 0.181               | 0.183                |
| Day FE                                                    | Yes                  | Yes                    | Yes                 | Yes                  |
| Demographics                                              | Yes                  | Yes                    | Yes                 | Yes                  |
| Trump margin × Day FE                                     | Yes                  | Yes                    | Yes                 | Yes                  |
| COVID controls                                            | Yes                  | Yes                    | Yes                 | Yes                  |
| Other tweets                                              | Yes                  | Yes                    | Yes                 | Yes                  |
| Orders                                                    | Yes                  | Yes                    | Yes                 | Yes                  |

Standard errors clustered at the state level. Sample is 94,690 county-days over the period March 1-March 31 2020. All specifications use a random effects estimator that allows intercepts to vary at the county-level. Treatment indicator equals one for all days after the governor of state  $s$  issues a tweet about staying home. "Trump vote margin" is county  $i$ 's vote margin for Donald Trump in the 2016 presidential election. Republican counties are those in which Trump's vote margin in 2016 was greater than zero. County-level demographic controls are median age, log household income, population density, share of population over 65, share black, share Hispanic, and share male. "COVID controls" include controls for county-level confirmed cases and state-level COVID-19 deaths. "Other tweets" includes controls for post-COVID and social distancing related tweets. "Orders" includes controls for whether the state has issued the following types of orders: emergency declarations, banning large gatherings, school closures, restaurant/bar closures, non-essential business closures, and stay-at-home orders. Footer at the bottom of the table refers to all specifications, while the footer after Panel C refers only to that panel. \*\*\*  $p < 0.01$ , \*\*  $p < 0.05$ , \*  $p < 0.1$ .

## D.6 Robustness: population weights

Throughout the paper, we estimate regressions on a daily panel of counties, unweighted by population. Consistent with the literature, we choose this strategy in order to estimate the average county-level effect. Under population weighting, it is likely that results will be driven primarily by larger, typically Democratic-leaning urban areas, whereas unweighted regressions allow us to uncover effects across the political spectrum. In this section, we consider how weighting by population affects the main estimates.

Table [SI-10](#) re-estimates the results from Table [2](#) with county-level population weights. The interpretation of these results is now at the level of individuals rather than counties. Panel A reveals that the main result remains large and statistically significant – governors’ tweets reduce mobility, reflected in 10.2 more minutes at home per day, on average. However, in column (2) we find that the negative interaction term with Trump’s 2016 vote margin is no longer statistically significant. This is likely because smaller pro-Trump counties that were previously driving this interaction effect have been down-weighted. In Panel B, the effect is positive and significant for both Republicans and Democrats, but larger for Republicans, in contrast to the main results. Looking at the nonlinear pattern of effects in Figure [SI-11](#), we can see that this is likely driven by the fact that population weighting up-weights Republican counties closer to the center – likely to be larger than those further to the right – which have large effect sizes. On the Democratic side, it up-weights larger cities, which are likely to be further left and actually have smaller effects than more centrist Democratic areas. Panel C of Table [SI-10](#) reveals that the triple-interaction effect is still of the correct sign, but smaller in magnitude and only significant for the logged dependent variable.

Table [SI-11](#) re-estimates the results from Table [SI-3](#) with county-level population weights. As in the unweighted regression, effects are still greater in Democratic rather than Republican states. The interaction terms with Trump’s 2016 vote margin remain of the same sign, though the size and significance in Panel B is greatly diminished. The negative marginal effect slope in Republican states and mildly positive marginal effect slope in Democratic states have both flattened.

Table SI-10: Governors' tweets, partisanship, and mobility, robustness to population weights

| <i>Panel A: Full sample</i>                               |                      |                      |                     |                     |
|-----------------------------------------------------------|----------------------|----------------------|---------------------|---------------------|
| Outcome                                                   | Median time at home  |                      | Log time at home    |                     |
| Post stay home message                                    | 10.162***<br>(3.506) | 10.204***<br>(3.543) | 0.019***<br>(0.007) | 0.019***<br>(0.007) |
| Post stay home message × Trump vote margin                |                      | -0.643<br>(0.815)    |                     | 0.001<br>(0.001)    |
| Observations                                              | 94690                | 94690                | 94690               | 94690               |
| R <sup>2</sup>                                            | 1.000                | 1.000                | 1.000               | 1.000               |
| <i>Panel B: By county party</i>                           |                      |                      |                     |                     |
| Outcome                                                   | Median time at home  |                      | Log time at home    |                     |
| County party                                              | Dem                  | GOP                  | Dem                 | GOP                 |
| Post stay home message                                    | 9.367**<br>(4.425)   | 11.754***<br>(3.563) | 0.010<br>(0.008)    | 0.027***<br>(0.007) |
| Observations                                              | 14708                | 79982                | 14708               | 79982               |
| R <sup>2</sup>                                            | 1.000                | 1.000                | 1.000               | 1.000               |
| <i>Panel C: Triple interactions</i>                       |                      |                      |                     |                     |
| Outcome                                                   | Median time at home  |                      | Log time at home    |                     |
| Interaction                                               | Cont. vote margin    | Binary               | Cont. vote margin   | Binary              |
| Post stay home message                                    | 13.917**<br>(5.458)  | 12.862*<br>(6.757)   | 0.017*<br>(0.009)   | 0.008<br>(0.012)    |
| Post stay home message × GOP governor                     | -9.246<br>(8.197)    | -5.307<br>(10.749)   | 0.003<br>(0.011)    | 0.017<br>(0.016)    |
| Post stay home message × Trump vote margin                | 0.581<br>(0.847)     |                      | 0.003**<br>(0.001)  |                     |
| Post stay home message × GOP governor × Trump vote margin | -1.418<br>(1.597)    |                      | -0.004<br>(0.002)   |                     |
| Post stay home message × GOP county                       |                      | 2.243<br>(5.692)     |                     | 0.018<br>(0.011)    |
| Post stay home message × GOP governor × GOP county        |                      | -10.039<br>(8.864)   |                     | -0.032**<br>(0.015) |
| GOP county × Day FE                                       | No                   | Yes                  | No                  | Yes                 |
| Trump margin × Day FE                                     | Yes                  | No                   | Yes                 | No                  |
| GOP gov × Day FE                                          | Yes                  | Yes                  | Yes                 | Yes                 |
| GOP county × GOP gov × Day FE                             | No                   | Yes                  | No                  | Yes                 |
| Trump margin × GOP gov × Day FE                           | Yes                  | No                   | Yes                 | No                  |
| Observations                                              | 94690                | 94690                | 94690               | 94690               |
| R <sup>2</sup>                                            | 1.000                | 1.000                | 1.000               | 1.000               |
| County FE                                                 | Yes                  | Yes                  | Yes                 | Yes                 |
| Day FE                                                    | Yes                  | Yes                  | Yes                 | Yes                 |
| Demographics × Day FE                                     | Yes                  | Yes                  | Yes                 | Yes                 |
| Trump margin × Day FE                                     | Yes                  | Yes                  | Yes                 | Yes                 |
| COVID controls                                            | Yes                  | Yes                  | Yes                 | Yes                 |
| Other tweets                                              | Yes                  | Yes                  | Yes                 | Yes                 |
| Orders                                                    | Yes                  | Yes                  | Yes                 | Yes                 |

Standard errors in parentheses clustered at the state level. All estimates weighted by county-level population. Sample is 96,690 county-days over the period March 1-March 31 2020. Treatment indicator equals one for all days after the governor of state  $s$  issues a tweet encouraging citizens to stay home. "Trump vote margin" is county  $i$ 's vote margin for Donald Trump in the 2016 presidential election. Republican counties are those in which Trump's vote margin in 2016 was greater than zero. County-level demographic controls are median age, log household income, population density, share of population over 65, share black, share Hispanic, and share male. "COVID controls" include controls for county-level confirmed cases and state-level COVID-19 deaths. "Other tweets" includes controls for post-COVID and social distancing related tweets. "Orders" includes controls for whether the state has issued the following types of orders: emergency declarations, banning large gatherings, school closures, restaurant/bar closures, non-essential business closures, and stay-at-home orders. Footer at the bottom of the table refers to all specifications, while the footer after Panel C refers only to that panel.

\*\*\*  $p < 0.01$ , \*\*  $p < 0.05$ , \*  $p < 0.1$ .

Table SI-11: Governors' stay home tweets and mobility by governor's party, robustness to population weights

| Outcome                                    | Median time at home |                     | Log time at home    |                     |
|--------------------------------------------|---------------------|---------------------|---------------------|---------------------|
|                                            | (1)                 | (2)                 | (3)                 | (4)                 |
| <i>Panel A: Democratic governors</i>       |                     |                     |                     |                     |
| Post stay home message                     | 13.060**<br>(5.091) | 13.305**<br>(4.888) | 0.016<br>(0.009)    | 0.017*<br>(0.009)   |
| Post stay home message × Trump vote margin |                     | 0.605<br>(0.801)    |                     | 0.003**<br>(0.001)  |
| Observations                               | 42750               | 42750               | 42750               | 42750               |
| $R^2$                                      | 1.000               | 1.000               | 1.000               | 1.000               |
| <i>Panel B: Republican governors</i>       |                     |                     |                     |                     |
| Post stay home message                     | 7.305*<br>(4.042)   | 8.341*<br>(4.653)   | 0.023***<br>(0.007) | 0.024***<br>(0.008) |
| Post stay home message × Trump vote margin |                     | -0.841<br>(1.113)   |                     | -0.001<br>(0.001)   |
| Observations                               | 51940               | 51940               | 51940               | 51940               |
| $R^2$                                      | 1.000               | 1.000               | 1.000               | 1.000               |
| County FE                                  | Yes                 | Yes                 | Yes                 | Yes                 |
| Day FE                                     | Yes                 | Yes                 | Yes                 | Yes                 |
| Demographics × Day FE                      | Yes                 | Yes                 | Yes                 | Yes                 |
| Trump margin × Day FE                      | Yes                 | Yes                 | Yes                 | Yes                 |
| COVID controls                             | Yes                 | Yes                 | Yes                 | Yes                 |
| Other tweets                               | Yes                 | Yes                 | Yes                 | Yes                 |
| Orders                                     | Yes                 | Yes                 | Yes                 | Yes                 |

Standard errors clustered at the state level. All estimates weighted by county-level population. Sample is 94,690 county-days over the period March 1-March 31 2020. Treatment indicator equals one for all days after the governor of state  $s$  issues a tweet about social distancing. "Trump vote margin" is county  $i$ 's vote margin for Donald Trump in the 2016 presidential election. Republican counties are those in which Trump's vote margin in 2016 was greater than zero. County-level demographic controls are median age, log household income, population density, share of population over 65, share black, share Hispanic, and share male. "COVID controls" include controls for county-level confirmed cases and state-level COVID-19 deaths. "Other tweets" includes controls for post-COVID and social distancing related tweets. "Orders" includes controls for whether the state has issued the following types of orders: emergency declarations, banning large gatherings, school closures, restaurant/bar closures, non-essential business closures, and stay-at-home orders. \*\*\*  $p < 0.01$ , \*\*  $p < 0.05$ , \*  $p < 0.1$ .

## D.7 Robustness: outliers

In Table [SI-12](#), we re-estimate the main results after dropping outliers or county-days with low device coverage. We define outliers as county-days where the median time at home was in the bottom or top 2.5% of the county-day distribution. Observations with low device coverage are those in which the number of reporting devices is less than 5% of the county population. We find that after trimming outliers in columns 1-2, the results are basically identical to the main results in Table [2](#). However, in columns 3-4 we find that after dropping county-days with low device coverage, the main results in Panel A and B are actually stronger than in the full sample, while the triple-interaction terms in Panel C are of the right sign but no longer significant at the 5% level, but rather only at the 10% level.

Table SI-12: Governors' tweets, partisanship, and mobility, robustness to outliers

| Outcome                                                   | Median time at home  |                       |                      |                      |
|-----------------------------------------------------------|----------------------|-----------------------|----------------------|----------------------|
|                                                           | Outliers             |                       | Low device count     |                      |
|                                                           | (1)                  | (2)                   | (3)                  | (4)                  |
| <i>Panel A: Full sample</i>                               |                      |                       |                      |                      |
| Post stay home message                                    | 9.874***<br>(3.389)  | 14.339***<br>(4.474)  | 12.997***<br>(3.462) | 22.550***<br>(5.122) |
| Post stay home message × Trump vote margin                |                      | -1.406*<br>(0.724)    |                      | -2.487***<br>(0.858) |
| Observations                                              | 89981                | 89981                 | 69394                | 69394                |
| R <sup>2</sup>                                            | 0.986                | 0.986                 | 0.988                | 0.988                |
| <i>Panel B: By county party</i>                           |                      |                       |                      |                      |
| County party                                              | Dem                  | GOP                   | Dem                  | GOP                  |
| Post stay home message                                    | 18.426**<br>(7.289)  | 9.498***<br>(3.197)   | 18.809***<br>(5.184) | 12.964***<br>(3.613) |
| Observations                                              | 13326                | 76655                 | 6404                 | 62990                |
| R <sup>2</sup>                                            | 0.987                | 0.987                 | 0.991                | 0.988                |
| <i>Panel C: Triple interactions</i>                       |                      |                       |                      |                      |
| Interaction                                               | Cont. vote margin    | Binary                | Cont. vote margin    | Binary               |
| Post stay home message                                    | 9.304<br>(5.726)     | 5.697<br>(6.629)      | 18.532**<br>(7.341)  | 20.646**<br>(8.534)  |
| Post stay home message × GOP governor                     | 10.157<br>(7.598)    | 26.716**<br>(10.461)  | 1.250<br>(9.267)     | 15.223<br>(18.455)   |
| Post stay home message × Trump vote margin                | 1.709*<br>(0.930)    |                       | 0.682<br>(1.694)     |                      |
| Post stay home message × GOP governor × Trump vote margin | -5.137***<br>(1.195) |                       | -3.439*<br>(1.840)   |                      |
| Post stay home message × GOP county                       |                      | 10.151**<br>(4.806)   |                      | 0.944<br>(9.136)     |
| Post stay home message × GOP governor × GOP county        |                      | -43.854***<br>(9.297) |                      | -34.859*<br>(17.955) |
| GOP county × Day FE                                       | No                   | Yes                   | No                   | Yes                  |
| Trump margin × Day FE                                     | Yes                  | No                    | Yes                  | No                   |
| GOP gov × Day FE                                          | Yes                  | Yes                   | Yes                  | Yes                  |
| GOP county × GOP gov × Day FE                             | No                   | Yes                   | No                   | Yes                  |
| Trump margin × GOP gov × Day FE                           | Yes                  | No                    | Yes                  | No                   |
| COVID controls                                            | Yes                  | Yes                   | Yes                  | Yes                  |
| Other tweets                                              | Yes                  | Yes                   | Yes                  | Yes                  |
| Orders                                                    | Yes                  | Yes                   | Yes                  | Yes                  |
| Observations                                              | 89981                | 89981                 | 69394                | 69394                |
| R <sup>2</sup>                                            | 0.987                | 0.986                 | 0.988                | 0.988                |
| County FE                                                 | Yes                  | Yes                   | Yes                  | Yes                  |
| Day FE                                                    | Yes                  | Yes                   | Yes                  | Yes                  |
| Demographics × Day FE                                     | Yes                  | Yes                   | Yes                  | Yes                  |
| Trump margin × Day FE                                     | Yes                  | Yes                   | Yes                  | Yes                  |
| COVID controls                                            | Yes                  | Yes                   | Yes                  | Yes                  |
| Other tweets                                              | Yes                  | Yes                   | Yes                  | Yes                  |
| Orders                                                    | Yes                  | Yes                   | Yes                  | Yes                  |

Standard errors in parentheses clustered at the state level. Sample is indicated in table header. Outliers are county-days below the bottom 2.5% and above the top 2.5% of the distribution of median time at home. Low device count are county-days where the number of devices sampled is less than 5% of the population. Treatment indicator equals one for all days after the governor of state  $s$  issues a tweet encouraging citizens to stay home. "Trump vote margin" is county  $i$ 's vote margin for Donald Trump in the 2016 presidential election. Republican counties are those in which Trump's vote margin in 2016 was greater than zero. County-level demographic controls are median age, log household income, population density, share of population over 65, share black, share Hispanic, and share male. "COVID controls" include controls for county-level confirmed cases and state-level COVID-19 deaths. "Other tweets" includes controls for post-COVID and social distancing related tweets. "Orders" includes controls for whether the state has issued the following types of orders: emergency declarations, banning large gatherings, school closures, restaurant/bar closures, non-essential business closures, and stay-at-home orders. Footer at the bottom of the table refers to all specifications, while the footer after Panel C refers only to that panel. \*\*\*  $p < 0.01$ , \*\*  $p < 0.05$ , \*  $p < 0.1$ .

## D.8 Robustness: local orders

Local social distancing policies often pre-dated state-level policies. According to data from the COVID-19 Local Action Tracker, 178 US cities covering 62.9 million inhabitants independently implemented COVID-19 containment or curve-flattening policies – up to and including full lockdowns – during the month of March. The earliest such policy occurred on March 4th, just one day after the first governor in our sample begins tweeting about social distancing. These local actions may be correlated across both time and space with governors’ messaging and could therefore bias our difference-in-differences results. Furthermore, given the geography of US partisanship, if these local actions are concentrated primarily in urban areas, then they will affect primarily democratic counties. These local policies could therefore account for the differential partisan response to governors’ messaging if they both correlate in time with these state-level messages and are concentrated in Democratic-leaning urban areas of states where governors send these messages.

To rule out this confounding effect, we re-estimate the main specifications controlling directly for time-varying local policies. We consider all local policies that are in any way directed at “prevention/cure-flattening,” using the coding system of the COVID-19 Local Action Tracker. Since these orders are issued at the city level, we define an indicator variable that equals one if a county contains a city that implements a COVID-19 containment policy. We also test robustness to interacting this variable with the share of the county population affected by the order or measuring it as the cumulative number of local policy orders.

The results are presented in Table [SI-13](#). Columns 1-4 estimate the main effect of governors’ messaging, while columns 5-8 estimate the differential effect by partisanship. The baseline results are re-printed in columns (1) and (5) for reference. Overall, the estimates indicate that neither the main effects, nor the interactions with partisanship, are changed by including controls for local policy actions. All effects retain the same sign, significance, and magnitude once local policy controls are included. Reassuringly, the coefficients on the local policy covariate are of the correct sign and significant for all measures except the population share. The results suggest that local policies also lead to a significant reduction in county-level mobility, but that these policies are largely orthogonal both to governors’ messaging and local patterns of partisan response to this messaging.

Table SI-13: Governors' tweets, partisanship, and mobility, robustness to local orders

| Outcome                                         | Median time at home  |                      |                      |                      |                      |                      |                      |                      |
|-------------------------------------------------|----------------------|----------------------|----------------------|----------------------|----------------------|----------------------|----------------------|----------------------|
|                                                 | (1)                  | (2)                  | (3)                  | (4)                  | (5)                  | (6)                  | (7)                  | (8)                  |
| Post stay home message                          | 10.409***<br>(3.542) | 10.439***<br>(3.545) | 10.364***<br>(3.555) | 10.387***<br>(3.546) | 15.694***<br>(4.697) | 15.682***<br>(4.688) | 15.446***<br>(4.696) | 15.621***<br>(4.705) |
| Post stay home message × Trump vote margin      |                      |                      |                      |                      | -1.679**<br>(0.707)  | -1.666**<br>(0.704)  | -1.614**<br>(0.703)  | -1.662**<br>(0.709)  |
| Local policy active                             |                      | 12.287**<br>(5.114)  |                      |                      |                      | 12.190**<br>(5.022)  |                      |                      |
| Cumulative local policies                       |                      |                      | 3.941***<br>(1.258)  |                      |                      |                      | 3.835***<br>(1.235)  |                      |
| County population share covered by local policy |                      |                      |                      | 0.174<br>(0.128)     |                      |                      |                      | 0.170<br>(0.128)     |
| Observations                                    | 94690                | 94690                | 94690                | 94690                | 94690                | 94690                | 94690                | 94690                |
| R <sup>2</sup>                                  | 0.984                | 0.984                | 0.984                | 0.984                | 0.984                | 0.984                | 0.984                | 0.984                |
| County FE                                       | Yes                  |
| Day FE                                          | Yes                  |
| Demographics × Day FE                           | Yes                  |
| Trump margin × Day FE                           | Yes                  |
| COVID controls                                  | Yes                  |
| Other tweets                                    | Yes                  |
| Orders                                          | Yes                  |

Standard errors in parentheses clustered at the state level. Treatment indicator equals one for all days after the governor of state  $s$  issues a tweet encouraging citizens to stay home. "Trump vote margin" is county  $i$ 's vote margin for Donald Trump in the 2016 presidential election. "Local policy active" is a dummy variable equaling one in all days after the first city-level containment order occurs in a given county. "Cumulative local policies" is the cumulative number of city-level orders in a given county as of time  $t$ . "County population share covered by local policy" interacts the "local policy active" dummy with the maximum share of the county-level population affected by an order. County-level demographic controls are median age, log household income, population density, share of population over 65, share black, share Hispanic, and share male. "COVID controls" include controls for county-level confirmed cases and state-level COVID-19 deaths. "Other tweets" includes controls for post-COVID and social distancing related tweets. "Orders" includes controls for whether the state has issued the following types of orders: emergency declarations, banning large gatherings, school closures, restaurant/bar closures, non-essential business closures, and stay-at-home orders. \*\*\*  $p < 0.01$ , \*\*  $p < 0.05$ , \*  $p < 0.1$ .



## D.9 Robustness: block-group-level data

Our main results use counties as the unit of analysis, which geographically aggregates individual political preferences, which we do not observe. As such, they may be affected by an ecological inference problem – we are unable to say whether Democratic vs. Republican *voters* are responding differentially, only that the effects vary by average county-level partisan skew. For us to observe the county-level results of Table 2 in absence of any differential partisan response at the individual level, it must be the case that Republicans respond more than Democrats in Democratic counties, while the reverse is true in Republican counties. We see no reason *ex-ante* that this would be the case; in fact, we note that recent survey evidence is supportive of individual-level partisan differences in self-reported social distancing beliefs and behavior (3; 4).

Still, we attempt to allay this ecological inference critique by using more disaggregated data. Individual voter-level mobility and partisanship data are not available. However, Safegraph mobility data is available at the census block-group level, which is a standardized census unit containing between 600-3000 people. Electoral data is available at the precinct level, which is the smallest voting unit defined by the state government, containing an average of 833 voters in 2016. At this level of disaggregation, political preferences are substantially more homogenous and it is difficult to argue that offsetting individual effects are driving the results. Figure SI-12 plots the distribution of Trump’s vote margin separately at the block-group and county levels. The tails of the distribution, particularly left tail, have much greater mass at the block-group level, indicating a greater density of extreme voting in the disaggregated data.

Several issues arise in replicating our main specifications at the census block-group level. Firstly, electoral precincts and block groups vary in geographic extent, and there is no clear geographic mapping between the two (in some states the former is larger, in others, the latter). To match census block groups to electoral precincts, we identify the geographical intersections between each set of units. We then define the political preferences at the block-group level as the weighted average of Trump’s 2016 vote margin for all precincts that intersect a given block group, where the weights are the share of the block group geographic area that falls within a given electoral precinct.

Secondly, precinct-level electoral data with accompanying geographic information is only available for 38 states<sup>17</sup>. Since the variation of interest (governors’ statements) occurs at the state-level, this substantially reduces an already-small number of clusters, with implications for statistical power. These states also may not be representative of the whole country.

---

<sup>17</sup> These states are AZ, AR, CA, CO, DE, FL, GA, HI, IA, IL, KS, KY, LA, MA, MD, ME, MI, MN, MO, MT, NC, ND, NE, NH, NM, NV, OK, OR, RI, SC, TN, TX, UT, VA, VT, WA, WI, WY

Finally, there is substantially less heterogeneity in population size at the block-group-level than the county-level. As such, unweighted estimates at the block-group level cannot be directly compared to unweighted county-level estimates, and are in fact closer to the population-weighted estimates in SI [D.6](#). To address this issue, we also present re-weighted block-group-level estimates, where the weights are the inverse of the number of block groups in a county. This serves to up-weight more sparsely populated counties with fewer block groups, so that the weights more closely resemble those implicit in the main unweighted county-level specification. For all of these reasons, we emphasize the county-level results of our main specifications.

We present the block-group-level estimates in Table [SI-14](#). To ensure a comparable sample, we first re-estimate the main (column 1) and partisan interaction (column 2) effects on the county-level data for the subsample of 38 states for which precinct-level data is available, presenting results for the pooled sample (Panel A), Democratic governors (Panel B), and Republican governors (Panel C). We then re-estimate the main (column 3) and partisan interaction (columns 4-6) effects on the block-group-level data. For the partisan interaction effects we consider county fixed effects (column 4), block-group fixed effects (column 5), and block-group fixed effects with inverse county size weights (column 6).

Column 1, Panel A shows that the county-level effect in the 38-state sample is smaller in magnitude than in the full sample in Table [2](#) (8.4 minutes vs. 10.4 minutes). However, the interaction in effect is actually somewhat larger. The main effects at the precinct-level in Panel A, column 3 remain positive and significant – governors’ messaging leads to 13.8 additional minutes spent at home per day on average. The baseline and interaction effects in column (4) are smaller than the county-level effects of column (2), and the interaction term is no longer significant. The interaction term is negative but much smaller in column (5). However, when we re-weight in column (6) to match the county-level results, the interaction term is negative, significant, and very similar in magnitude to the county-level results of column (2).

The main result of Table [SI-3](#) and Table [2](#) Panel C is that the differential partisan response is greatest under Republican governors. The block-group-level results of Table [SI-14](#) Panels B and C generally support these findings. In Democratic states (Panel B), there is no differential partisan response regardless of the specification choice. In contrast, in Republican-controlled states (Panel B) the interaction effect is negative and significant except in the unweighted specification with block-group fixed effects (column 5), where it is still negative but smaller in magnitude and insignificant. Note that in Panel C, the interaction terms in columns (4) and (6) – both 3.1 – are similar to the 3.81 estimated in column (2). At the same time, note that the unweighted estimates in Panels B

and C column (5) are similar in magnitude to the population-weighted county-level results in Table SI-10 column (2) Panels A and B, respectively. This suggests that the more uniform size of census block-groups is driving the divergence between unweighted county and block-group-level results, implying that re-weighting is necessary to preserve comparability with the main county-level results.

Figure SI-12: Distribution of Trump's 2016 vote margin

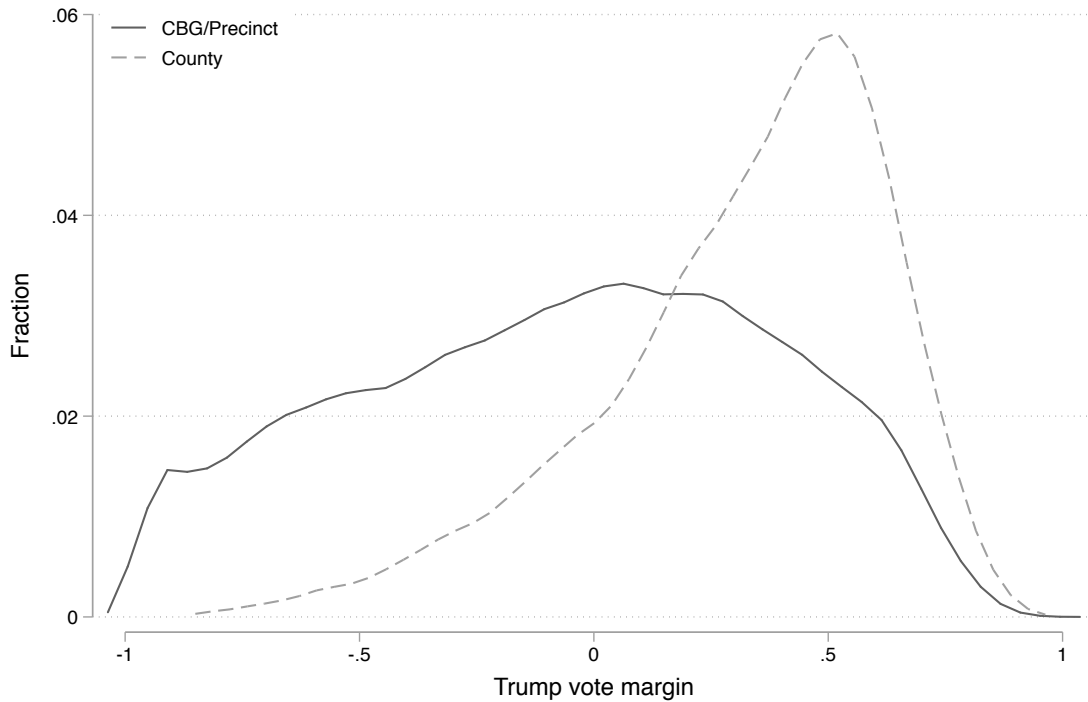

**Note:** Figure shows the distribution of Trump's vote margin in the 2016 presidential election at the level of counties and census-block-groups (CBG).

Table SI-14: Governors' stay home tweets and mobility by governor's party, census block-group-level

| Outcome                                    | Median time at home |           |                    |           |             |           |
|--------------------------------------------|---------------------|-----------|--------------------|-----------|-------------|-----------|
|                                            | County              |           | Census block-group |           |             |           |
| Unit                                       |                     |           | Unweighted         |           | Re-weighted |           |
| Weights                                    | (1)                 | (2)       | (3)                | (4)       | (5)         | (6)       |
| <i>Panel A: Full sample</i>                |                     |           |                    |           |             |           |
| Post stay home message                     | 8.379*              | 18.599*** | 13.848***          | 12.784*** | 13.607***   | 13.449**  |
|                                            | (4.282)             | (5.954)   | (3.675)            | (3.498)   | (3.530)     | (5.124)   |
| Post stay home message × Trump vote margin |                     | -2.254**  |                    | -1.528    | -0.100      | -1.964**  |
|                                            |                     | (1.077)   |                    | (0.959)   | (0.733)     | (0.841)   |
| Observations                               | 74709               | 74709     | 4680873            | 4680873   | 4680873     | 4680873   |
| R <sup>2</sup>                             | 0.787               | 0.789     | 0.709              | 0.268     | 0.710       | 0.671     |
| <i>Panel B: Democratic governors</i>       |                     |           |                    |           |             |           |
| Post stay home message                     | 9.546*              | 9.413     | 5.632              | 6.367     | 6.426       | 6.553     |
|                                            | (4.873)             | (6.880)   | (4.189)            | (4.227)   | (4.256)     | (4.989)   |
| Post stay home message × Trump vote margin |                     | 0.442     |                    | 0.894     | 1.438**     | 0.324     |
|                                            |                     | (1.308)   |                    | (0.943)   | (0.662)     | (0.624)   |
| Observations                               | 36157               | 36157     | 2597094            | 2597094   | 2597094     | 2597094   |
| R <sup>2</sup>                             | 0.794               | 0.795     | 0.708              | 0.275     | 0.708       | 0.664     |
| <i>Panel C: Republican governors</i>       |                     |           |                    |           |             |           |
| Post stay home message                     | 1.109               | 20.759**  | 10.303**           | 12.140**  | 11.275**    | 12.405**  |
|                                            | (3.653)             | (8.296)   | (3.888)            | (4.310)   | (4.075)     | (5.742)   |
| Post stay home message × Trump vote margin |                     | -3.807**  |                    | -3.081**  | -0.818      | -3.116*** |
|                                            |                     | (1.611)   |                    | (1.106)   | (0.942)     | (1.005)   |
| Observations                               | 38552               | 38552     | 2083779            | 2083779   | 2083779     | 2083779   |
| R <sup>2</sup>                             | 0.783               | 0.785     | 0.708              | 0.244     | 0.708       | 0.680     |
| County FE                                  | Yes                 | Yes       | No                 | Yes       | No          | No        |
| Day FE                                     | Yes                 | Yes       | Yes                | Yes       | Yes         | Yes       |
| CBG FE                                     | No                  | No        | Yes                | No        | Yes         | Yes       |
| Trump margin × Day FE                      | No                  | Yes       | No                 | Yes       | Yes         | Yes       |
| Other tweets                               | Yes                 | Yes       | Yes                | Yes       | Yes         | Yes       |
| Orders                                     | Yes                 | Yes       | Yes                | Yes       | Yes         | Yes       |

Standard errors clustered at the state level. Sample is 74,709 county-days or 4,680,873 block-group-days over the period March 1-March 31 2020 for 38 states. Treatment indicator equals one for all days after the governor of state  $s$  issues a tweet about social distancing. Re-weighted specifications weight the estimates by the inverse of county size, measured by number of block groups. "Trump vote margin" is census block group  $i$ 's vote margin for Donald Trump in the 2016 presidential election, calculated as the weighted average Trump margin of all of the electoral precincts geographically intersecting  $i$ , where the weights are the share of area intersected. "Other tweets" includes controls for post-COVID and social distancing related tweets. "Orders" includes controls for whether the state has issued the following types of orders: emergency declarations, banning large gatherings, school closures, restaurant/bar closures, non-essential business closures, and stay-at-home orders. \*\*\*  $p < 0.01$ , \*\*  $p < 0.05$ , \*  $p < 0.1$ .

## D.10 Robustness: specification choice and county-specific time trends

In Figure [SI-7](#), we present evidence that there are no differential pre-trends in social distancing outcomes prior to a governor’s initial stay-at-home messaging, increasing our confidence in the identification assumption of parallel trends required for the main estimates to be interpreted as causal effects of governors’ messaging. In this section, we consider an additional test of this identification assumption. In particular, counties receiving stay-home messaging may follow differential trends in outcomes after the message for unrelated reasons, biasing our causal estimate even in the absence of obvious pre-trends.

To address this concern, in Table [SI-15](#) we augment the main difference-in-differences specification with interactions between the county fixed-effects and linear time trends, allowing for county-specific linear trends in social distancing outcomes. We also consider robustness to removal or inclusion of the main control variables – COVID case counts, state-level policy orders, other governors’ messaging, and interacted county demographics. In general, we find that the main results hold. Conditional on county-specific linear time trends, governors’ stay at home messaging still increase time at home from 5-9 minutes daily on average, depending on specification choice. As before, these effects are more pronounced in Democratic counties (Panel B) relative to Republican ones (Panel C). However, the results lose significance in column (8).

In general, the effects are smaller when including county-specific time trends. We argue that this is because county-specific time trends are too exacting a robustness test. This test requires not just that social distancing rises in treated counties relative to control ones, but that it does so supra-linearly. Treatment effects now measure deviations above the linear trend in treatment relative to control counties, rather than level differences. In practice, this requires a large jump in social distancing in treated counties at the time of the messaging, rather than a gradual increase. Of course, Figure [SI-7](#) demonstrates that we indeed find a gradual increase in social distancing behavior in response to governors’ messaging, a dynamic pattern that is consistent with governors’ repeated messaging after an initial statement. As such, the inclusion of county-specific time trends may not be appropriate in our setting. Even so, we find that the results hold, albeit at somewhat smaller magnitudes.

Table SI-15: Governors' stay home tweets and mobility, county-specific time trends

| Outcome                             | Median time at home  |                     |                      |                    |                      |                   |
|-------------------------------------|----------------------|---------------------|----------------------|--------------------|----------------------|-------------------|
|                                     | (1)                  | (2)                 | (3)                  | (4)                | (5)                  | (6)               |
| <i>Panel A: Full sample</i>         |                      |                     |                      |                    |                      |                   |
| Post stay home message              | 20.859***<br>(3.855) | 9.308***<br>(3.109) | 10.617***<br>(3.911) | 6.354**<br>(2.547) | 8.617**<br>(3.953)   | 5.033*<br>(2.774) |
| Observations                        | 94690                | 94690               | 94690                | 94690              | 94690                | 94690             |
| R <sup>2</sup>                      | 0.790                | 0.822               | 0.792                | 0.823              | 0.803                | 0.828             |
| <i>Panel B: Democratic counties</i> |                      |                     |                      |                    |                      |                   |
| Post stay home message              | 34.723***<br>(7.852) | 7.890<br>(5.711)    | 21.187***<br>(6.112) | 7.338<br>(5.633)   | 21.363***<br>(7.693) | 8.479<br>(5.621)  |
| Observations                        | 14708                | 14708               | 14708                | 14708              | 14708                | 14708             |
| R <sup>2</sup>                      | 0.841                | 0.880               | 0.844                | 0.881              | 0.868                | 0.894             |
| <i>Panel C: Republican counties</i> |                      |                     |                      |                    |                      |                   |
| Post stay home message              | 17.876***<br>(3.891) | 9.612***<br>(3.099) | 9.015**<br>(3.954)   | 6.073**<br>(2.464) | 8.458**<br>(3.468)   | 4.547<br>(2.955)  |
| Observations                        | 79982                | 79982               | 79982                | 79982              | 79982                | 79982             |
| R <sup>2</sup>                      | 0.778                | 0.806               | 0.779                | 0.807              | 0.789                | 0.813             |
| County FE                           | Yes                  | Yes                 | Yes                  | Yes                | Yes                  | Yes               |
| Day FE                              | Yes                  | Yes                 | Yes                  | Yes                | Yes                  | Yes               |
| County FE × linear time trends      | No                   | Yes                 | No                   | Yes                | No                   | Yes               |
| Demographics × Day FE               | No                   | No                  | No                   | No                 | Yes                  | Yes               |
| COVID controls                      | No                   | No                  | Yes                  | Yes                | Yes                  | Yes               |
| Other tweets                        | No                   | No                  | Yes                  | Yes                | Yes                  | Yes               |
| Orders                              | No                   | No                  | Yes                  | Yes                | Yes                  | Yes               |

Standard errors clustered at the state level. Sample is 94,690 county-days over the period March 1-March 31 2020. Treatment indicator equals one for all days after the governor of state  $s$  issues a tweet about social distancing. Republican counties are those in which Trump's vote margin in 2016 was greater than zero. County-level demographic controls are median age, log household income, population density, share of population over 65, share black, share Hispanic, and share male. "COVID controls" include controls for county-level confirmed cases and state-level COVID-19 deaths. "Other tweets" includes controls for post-COVID and social distancing related tweets. "Orders" includes controls for whether the state has issued the following types of orders: emergency declarations, banning large gatherings, school closures, restaurant/bar closures, non-essential business closures, and stay-at-home orders. \*\*\*  $p < 0.01$ , \*\*  $p < 0.05$ , \*  $p < 0.1$ .

## D.11 Robustness: Facebook data as proxy for messaging

Throughout our analysis, we use Twitter posts as a proxy for governors' public messaging around COVID-19. We do not believe that Twitter is the only, or even the most important channel through which governors' release public statements on COVID-19. However, we use tweets because they are a widely available public data source that succinctly captures governors' positions on these issues. They serve merely as a convenient and reliable proxy for messaging. Similar content, however, is released via other forums, notably governors' Facebook accounts. In Figure [SI-3](#), we show that governors content is highly correlated across social media platform. The timing of governors' tweets encouraging citizens to stay at home behavior is highly correlated with the timing Facebook posts with the same content.

Given this observation, we consider whether the main results replicate when we use Facebook activity as a proxy for messaging instead of Twitter activity. This may allay concerns that Twitter posts are not as widely seen as Facebook posts, since Facebook is a more widely used social media platform. Table [SI-16](#) estimates the main regressions on the full sample (Panel A), Democratic governors (Panel B), and Republican governors (Panel C) using the date of the first Facebook post encouraging residents to stay home to construct the treatment indicator. We find nearly identical results in direction, magnitude, and significance, to the main results using Twitter data.

Table SI-16: Governors' stay home Facebook posts and mobility

| Outcome                                    | Median time at home  |                      |                     |                     |
|--------------------------------------------|----------------------|----------------------|---------------------|---------------------|
|                                            | (1)                  | (2)                  | (3)                 | (4)                 |
| <i>Panel A: Full sample</i>                |                      |                      |                     |                     |
| Post stay home message                     | 12.827***<br>(4.630) | 18.856***<br>(5.518) | 0.040***<br>(0.012) | 0.044***<br>(0.015) |
| Post stay home message × Trump vote margin |                      | -1.952**<br>(0.730)  |                     | -0.001<br>(0.002)   |
| Observations                               | 94690                | 94690                | 94690               | 94690               |
| $R^2$                                      | 0.984                | 0.984                | 0.997               | 0.997               |
| <i>Panel B: Democratic governors</i>       |                      |                      |                     |                     |
| Post stay home message                     | 19.160***<br>(5.552) | 20.371***<br>(5.942) | 0.035**<br>(0.017)  | 0.032*<br>(0.016)   |
| Post stay home message × Trump vote margin |                      | -0.488<br>(0.782)    |                     | 0.001<br>(0.002)    |
| Observations                               | 42750                | 42750                | 42750               | 42750               |
| $R^2$                                      | 0.983                | 0.983                | 0.997               | 0.997               |
| <i>Panel C: Republican governors</i>       |                      |                      |                     |                     |
| Post stay home message                     | 2.632<br>(5.651)     | 14.731*<br>(8.113)   | 0.033**<br>(0.015)  | 0.058**<br>(0.026)  |
| Post stay home message × Trump vote margin |                      | -3.053***<br>(1.020) |                     | -0.006<br>(0.005)   |
| Observations                               | 51940                | 51940                | 51940               | 51940               |
| $R^2$                                      | 0.985                | 0.985                | 0.998               | 0.998               |
| County FE                                  | Yes                  | Yes                  | Yes                 | Yes                 |
| Day FE                                     | Yes                  | Yes                  | Yes                 | Yes                 |
| Demographics × Day FE                      | Yes                  | Yes                  | Yes                 | Yes                 |
| Trump margin × Day FE                      | Yes                  | Yes                  | Yes                 | Yes                 |
| COVID controls                             | Yes                  | Yes                  | Yes                 | Yes                 |
| Other tweets                               | Yes                  | Yes                  | Yes                 | Yes                 |
| Orders                                     | Yes                  | Yes                  | Yes                 | Yes                 |

Standard errors clustered at the state level. Sample is 94,690 county-days over the period March 1-March 31 2020. Treatment indicator equals one for all days after the governor of state  $s$  issues a Facebook post about social distancing. "Trump vote margin" is county  $i$ 's vote margin for Donald Trump in the 2016 presidential election. County-level demographic controls are median age, log household income, population density, share of population over 65, share black, share Hispanic, and share male. "COVID controls" include controls for county-level confirmed cases and state-level COVID-19 deaths. "Other tweets" includes controls for post-COVID and social distancing related Facebook posts. "Orders" includes controls for whether the state has issued the following types of orders: emergency declarations, banning large gatherings, school closures, restaurant/bar closures, non-essential business closures, and stay-at-home orders. \*\*\*  $p < 0.01$ , \*\*  $p < 0.05$ , \*  $p < 0.1$ .
